# Supplementary material for: A Bilayer Microarray Patch (MAP) for HIV Pre-Exposure Prophylaxis: The Role of MAP Designs and Formulation Composition in Enhancing Long-Acting Drug Delivery
Source: Pharmaceutics. 2024 Jan 20;16(1):142. doi: 10.3390/pharmaceutics16010142 (PMC10819247; doi:10.3390/pharmaceutics16010142)
Supplement: Supplementary file 1 [file pharmaceutics-16-00142-s001.zip]

Archive with 6 entries (6 files):
- Figure 4 raw data file.xlsx
- Figure 5  and 6 raw data file.xlsx
- Figure 7 raw data file.xlsx
- Figure 8 In vivo single dose raw data file.xlsx
- FIgure 9 raw data file.xlsx
- supplementary figures.pdf
