# Supplementary material for: A Bilayer Microarray Patch (MAP) for HIV Pre-Exposure Prophylaxis: The Role of MAP Designs and Formulation Composition in Enhancing Long-Acting Drug Delivery
Source: Pharmaceutics. 2024 Jan 20;16(1):142. doi: 10.3390/pharmaceutics16010142 (PMC10819247; doi:10.3390/pharmaceutics16010142)
Supplement: Supplementary file 1 [file pharmaceutics-16-00142-s001.zip › Figure 4 raw data file.xlsx]

## Sheet: Figure 4 raw data
		Drug Content	MAP-D1	MAP-D2	MAP-D3	MAP-D4	MAP-D5	MAP-D6											In vivo skin deposition
		Average (ug)	2714.63	1104.75	1813.79	1756.87	3279.2	2867.12												ug amount of total CAB deposited	SD	% Drug Deposited	SD
		Standard Deviation	738.785	104.531	151.5	48.1611	88.1	379.3											MAP-D1	317.987	57.1623	11.714	2.10574
																			MAP-D2	242.155	41.3822	21.6531	3.76343
		CAB Na Deposition (ug/MAP)	MAP-D1	MAP-D2	MAP-D3	MAP-D4	MAP-D5	MAP-D6											MAP-D3	387.555	69.7391	22.2693	4.28372
		Average (ug)	421.019	278.62	571.9	624.515	589.7	354.8											MAP-D4	399.739	96.164	22.7512	5.4732
		Standard Deviation	41.6656	61.08	63.2	48.5	77.3	94.3											MAP-D5	513.309	93.4499	15.6535	2.84978
																			MAP-D6	236.759	26.2991	8.3168	0.958057
		% CAB Na depostion	MAP-D1	MAP-D2	MAP-D3	MAP-D4	MAP-D5	MAP-D6
		Average (%)	15.5129	25.2378	31.5	35.5471	17.983	12.4
		Standard Deviation	1.53521	6	3.5	3	2.4	3.6
Drug content calculation from MAP D1 to D6
MAP-D1	MAP Drug Content calculation
		Calculation from Linearity eqaution
MAP	Area	Conc (ug)	Conc (ug)	Dilution factor	Dilution factor (ug Permeated)	Average (ug/MAP)	Standard Deviation											In vivo skin deposition
1	6754.1	6474.1	43.1607	215.803	2158.03	2714.63	738.785											MAP-D1		Calculation from Linearity eqaution
2	10938.4	10658.4	71.056	355.28	3552.8													number	Area	Conc (ug)	Conc (ug)	Conc (ug)	ug deposited	ug amount of total deposited in rat/MAP	Average	SD	% Drug Deposited	Average	SD
3	7579.2	7299.2	48.6613	243.307	2433.07													1	467.5	780.54	4.49232	4.48917	224.459	279.959	317.987	57.1623	10.3131	11.714	2.10574
																		2	440.7	753.74	4.33807	4.33504	216.752	272.252			10.0292
																		3	465.8	778.84	4.48253	4.47939	223.97	279.47			10.2951
																		4	619.7	932.74	5.36829	5.36453	268.226	323.726			11.9254
Ex-Vivo skin Deposition (ug/MAP)								Ex-Vivo skin Deposition (%/MAP)										5	616.3	929.34	5.34872	5.34498	267.249	322.749			11.8894
		Calculation from Linearity eqaution																6	522.63	835.67	4.80961	4.80624	240.312	295.812			10.8971
MAP-D1	Area	Conc (ug)	Conc (ug)	Dilution factor	drug deposited (ug)	Average (ug)	Standard Deviation	%dose delivered per MAP	Average (%)	Standard Deviation								7	608.2	921.24	5.3021	5.29839	264.919	320.419			11.8036
1	1389.4	9.03745	45.1872	451.872	451.872	421.019	41.6656	16.646	15.5094	1.53487								8	1057.1	1370.14	7.8857	7.88018	394.009	449.509			16.5589
2	1148.8	7.47245	37.3622	373.622	373.622			13.7634
3	1345.4	8.75124	43.7562	437.562	437.562			16.1188
																		In vivo skin deposition
																		MAP-D2		Calculation from Linearity eqaution			Dilution factor
MAP-D2	MAP Drug Content calculation																	number	Area	Conc (ug)	Conc (ug)	Conc (ug)	ug deposited	ug amount of total deposited in rat/MAP	Average	SD	% Drug Deposited	Average	SD
		Calculation from Linearity eqaution																1	365.4	678.44	3.90469	3.90196	195.098	236.888	242.155	41.3822	21.4417	21.6531	3.76343
MAP	Area	Conc (ug)	Conc (ug)	Dilution factor	Dilution factor (ug Permeated)	Average (ug/MAP)	Standard Deviation											2	296.9	609.94	3.51045	3.50799	175.399	217.189			19.6587
1	3378.9	3622.85	22.7509	113.754	1137.54	1104.75	104.531											3	265.7	578.74	3.33088	3.32855	166.427	208.217			18.8466
2	3789	4032.95	25.3262	126.631	1266.31		`											4	528.8	841.84	4.84512	4.84173	242.087	283.877			25.6948
3	2845.4	3089.35	19.4006	97.003	970.03													5	283.5	596.54	3.43332	3.43092	171.546	213.336			19.3099
4	2984.1	3228.05	20.2716	101.358	1013.58													6	128.9	441.94	2.54354	2.54176	127.088	168.878			15.2858
5	3374.9	3618.85	22.7258	113.629	1136.29													7	273.7	586.74	3.37692	3.37456	168.728	210.518			19.0548
																		8	564.8	877.84	5.05232	5.04878	252.439	294.229			26.6319
Ex-Vivo skin Deposition (ug/MAP)																		9	654	967.04	5.5657	5.5618	278.09	319.88			28.9537
		Calculation from Linearity eqaution							Ex-Vivo skin Deposition (%/MAP)									10	404.8	717.84	4.13145	4.12856	206.428	248.218			22.4672
MAP-D2	Area	Conc (ug)	Conc (ug)	Dilution factor	drug deposited (ug)	Average (ug)	Standard Deviation	%dose delivered per MAP	Average (%)	Standard Deviation								11	489	802.04	4.61606	4.61283	230.641	272.431			24.6589
1	854.3	1098.25	6.89682	34.4841	344.841	278.625	61.0886	31.213	25.2195	5.97241								12	349.1	662.14	3.81088	3.80821	190.411	232.201			21.0174
2	464.8	708.75	4.45083	22.2541	222.541			20.1431
3	698.4	942.35	5.9178	29.589	295.89			26.7822
4	686.8	930.75	5.84495	29.2248	292.248			26.4525										MAP-D3		Calculation from Linearity eqaution
5	930.4	1174.35	7.37472	36.8736	368.736			33.3758											Area	Conc (ug)	Conc (ug)	Conc (ug)	Dilution factor	ug amount of total deposited in rat/MAP	Average	SD	% Drug Deposited	Average	SD
6	518.6	762.55	4.78868	23.9434	239.434			21.6722										1	761.7	1055.25	6.16348	6.15794	307.897	362.317	387.555	69.7391	19.9756	22.2693	4.28372
7	350.6	594.55	3.73367	18.6684	186.684			16.8975										2	601.5	895.05	5.22779	5.22309	261.154	315.574			17.3985
																		3	1015.6	1309.15	7.64646	7.63958	381.979	436.399			24.0599
MAP-D3	MAP Drug Content calculation																	4	817.9	1111.45	6.49174	6.48589	324.295	378.715			20.8796
		Calculation from Linearity eqaution																5	1456	1749.55	10.2187	10.2095	510.477	564.897			31.1444
MAP	Area	Conc (ug)	Conc (ug)	Dilution factor (ug)		Average (ug/MAP)	Standard Deviation											6	914.9	1208.45	7.05829	7.05194	352.597	407.017			22.44
1	5105.1	5473.2	33.2108	166.054	1660.54	1813.79	151.486											7	675	968.55	5.65709	5.652	282.6	337.02			18.5809
2	5435.5	5803.6	35.2156	176.078	1760.78													8	990.6	1284.15	7.50044	7.49369	374.684	429.104			23.6578
3	6290.1	6658.2	40.4012	202.006	2020.06													9	905.4	1198.95	7.0028	6.9965	349.825	404.245			22.2872
Ex-Vivo skin Deposition (ug/MAP)																		10	611	904.55	5.28328	5.27852	263.926	318.346			17.5513
		Calculation from Linearity eqaution							Ex-Vivo skin Deposition (%/MAP)									11	638.1	931.65	5.44156	5.43667	271.833	326.253			17.9873
MAP-D3	Area	Conc (ug)	Conc (ug)	Dilution factor	drug deposited (ug)	Average (ug)	Standard Deviation	%dose delivered per MAP	Average (%)	Standard Deviation								12	790.7	1084.25	6.33287	6.32717	316.358	370.778			20.4421
1	1262.3	1628.19	10.3905	51.9526	519.526	571.95	63.2319	28.6429	31.5332	3.48616
2	1267.9	1633.79	10.4262	52.1312	521.312			28.7415										MAP-D4		Calculation from Linearity eqaution
2	1410.8	1776.69	11.3382	56.6909	566.909			31.2553											Area	Conc (ug)	Conc (ug)	Conc (ug)	Dilution factor	ug amount of total deposited in rat/MAP	Average	SD	% Drug Deposited	Average	SD
3	1425.2	1791.09	11.4301	57.1504	571.504			31.5087										1	1034.9	1328.45	7.75918	7.7522	387.61	464.58	399.739	96.164	26.4417	22.7512	5.4732
3	1428.7	1794.59	11.4524	57.2621	572.621			31.5702										2	1059.2	1352.75	7.90112	7.894	394.7	471.67			26.8452
4	1460.1	1825.99	11.6528	58.264	582.64			32.1226										3	630.1	923.65	5.39484	5.38998	269.499	346.469			19.7194
4	1456.5	1822.39	11.6298	58.1491	581.491			32.0593										4	1342.6	1636.15	9.55639	9.54779	477.39	554.36			31.5515
4	1472.7	1838.59	11.7332	58.666	586.66			32.3443										5	596.5	890.05	5.19859	5.19391	259.695	336.665			19.1614
5	1627.8	1995.9	12.1109	60.5545	605.545			33.3855										6	531.8	825.35	4.82069	4.81635	240.817	317.787			18.0869
5	1622.6	1990.7	12.0794	60.3968	603.968			33.2985										7	493.6	787.15	4.59757	4.59343	229.672	306.642			17.4526
6	1862	2230.1	13.532	67.66	676.6			37.3029
6	1875.9	2244	13.6164	68.0818	680.818			37.5354
7	1179.4	1547.5	9.39006	46.9503	469.503			25.8851										MAP-D5		Calculation from Linearity eqaution
7	1175.1	1543.2	9.36397	46.8199	468.199			25.8131											Area	Conc (ug)	Conc (ug)	Conc (ug)	Dilution factor	ug amount of total deposited in rat/MAP	Average	SD	% Drug Deposited	Average	SD
																		1	1127.3	1420.85	8.29887	8.2914	414.57	517.56	513.309	93.4499	15.7831	15.6535	2.84978
MAP Drug Content calculation																		2	1131.9	1425.45	8.32574	8.31825	415.912	518.902			15.8241
				Calculation from Linearity eqaution														3	1082.7	1376.25	8.03837	8.03114	401.557	504.547			15.3863
MAP-D4	MAP	Area	Conc (ug)	Conc (ug)	Dilution factor (ug)		Average (ug/MAP)	Standard Deviation										4	1074.7	1368.25	7.99165	7.98446	399.223	502.213			15.3151
	1	5254.6	5622.7	34.1179	170.59	1705.9	1756.87	48.1611										5	1139.4	1432.95	8.36955	8.36201	418.101	521.091			15.8908
	2	5403.7	5771.8	35.0227	175.113	1751.13												6	1142.8	1436.35	8.3894	8.38185	419.093	522.083			15.921
	3	5350.6	5718.7	34.7005	173.502	1735.02												7	1510.7	1804.25	10.5382	10.5287	526.437	629.427			19.1945
	4	5681.5	6049.6	36.7083	183.542	1835.42												8	1514.1	1807.65	10.5581	10.5486	527.429	630.419			19.2248
Ex-Vivo skin Deposition (ug/MAP)																		9	525.6	819.15	4.78448	4.78017	239.008	341.998			10.4293
		Calculation from Linearity eqaution							Ex-Vivo skin Deposition (%/MAP)									10	518.5	812.05	4.74301	4.73874	236.937	339.927			10.3662
MAP-D4	Area	Conc (ug)	Conc (ug)	Dilution factor	drug deposited (ug)	Average (ug)	Standard Deviation	%dose delivered per MAP	Average (%)	Standard Deviation								11	930.1	1223.65	7.14707	7.14064	357.032	460.022			14.0285
1	1491	1859.1	11.2808	56.4041	564.041	624.515	48.8078	32.1062	35.5485	2.97004								12	946.9	1240.45	7.2452	7.23868	361.934	464.924			14.178
1	1470.3	1838.4	11.1552	55.7761	557.761			31.7487										13	1457.8	1751.35	10.2293	10.22	511.002	613.992			18.7238
3	1787.6	2155.7	13.0806	65.4028	654.028			37.2284										14	1475.7	1769.25	10.3338	10.3245	516.225	619.215			18.8831
3	1820.5	2188.6	13.2802	66.401	664.01			37.7965
4	1601.6	1969.7	11.9519	59.7596	597.596			34.0162										MAP-D6		Calculation from Linearity eqaution
4	1586.7	1954.8	11.8615	59.3076	593.076			33.7589										number	Area	Conc (ug)	Conc (ug)	Conc (ug)	Dilution factor	ug amount of total deposited in rat/MAP	Average	SD	% Drug Deposited	Average	SD
6	1887.7	2255.8	13.688	68.4398	684.398			38.9571										1	414.4	727.44	4.18671	4.18377	209.189	242.699	236.759	26.2991	8.46495	8.3168	0.958057
6	1877.2	2245.3	13.6242	68.1212	681.212			38.7757										2	342.6	655.64	3.77347	3.77083	188.541	222.051			7.74481
																		3	306.1	619.14	3.5634	3.5609	178.045	211.555			7.37871
																		4	494.2	807.24	4.64599	4.64273	232.137	265.647			9.26534
MAP-D5	MAP Drug Content calculation																	5	471.9	784.94	4.51764	4.51448	225.724	259.234			9.04168
		Calculation from Linearity eqaution																6	425.7	738.74	4.25174	4.24876	212.438	245.948			8.57829
MAP	Area	Conc (ug)	Conc (ug)	Conc (ug)	Dilution factor (ug)	Average (ug/MAP)	Standard Deviation											7	342.5	655.54	3.77289	3.77025	188.513	222.023			7.7438
1	10590.2	10883.8	63.5124	317.562	3175.62	3279.18	88.1264											8	451.6	764.64	4.40081	4.39773	219.886	253.396			8.83807
2	11328.4	11621.9	67.8202	339.101	3391.01													9	513.13	826.17	4.75494	4.75161	237.58	271.09			9.45521
3	10916.8	11210.3	65.4183	327.091	3270.91													10	236.78	549.82	3.16443	3.16222	158.111	191.621			6.68344
																		11	249.73	562.77	3.23896	3.2367	161.835	195.345			6.81332
Ex-Vivo skin Deposition (ug/MAP)																		12	476.3	789.34	4.54296	4.53978	226.989	260.499			9.08581
		Calculation from Linearity eqaution							Ex-Vivo skin Deposition (%/MAP)
MAP-D5	Area	Conc (ug)	Conc (ug)	Dilution factor	drug deposited (ug)	Average (ug)	Standard Deviation	%dose delivered per MAP	Average (%)	Standard Deviation
1	2083.7	2348.23	14.7792	73.8959	738.959	589.716	77.2682	22.5347	17.9835	2.35631
1	2061.1	2325.63	14.6369	73.1847	731.847			22.3178
2	1964.3	2228.83	14.0277	70.1385	701.385			21.3889
2	1968.5	2233.03	14.0541	70.2707	702.707			21.4292
3	1536.5	1801.03	11.3352	56.6762	566.762			17.2835
3	1530.6	1795.13	11.2981	56.4905	564.905			17.2269
4	1690.4	1954.93	12.3038	61.5192	615.192			18.7604
4	1700	1964.53	12.3643	61.8213	618.213			18.8526
5	1439.7	1704.23	10.726	53.63	536.3			16.3546
5	1432	1696.53	10.6775	53.3877	533.877			16.2807
1	1470.6	1836.49	11.7198	58.599	585.99			17.8699
1	1505.1	1870.99	11.9244	59.6222	596.222			18.1819
2	1441.5	1807.39	11.5191	57.5955	575.955			17.5639
2	1432.6	1798.49	11.4624	57.3119	573.119			17.4774
3	1170.3	1536.19	9.79065	48.9532	489.532			14.9284
3	1184.1	1549.99	9.8786	49.393	493.93			15.0625
4	1246.8	1612.69	10.2782	51.391	513.91			15.6718
4	1243.1	1608.99	10.2546	51.2731	512.731			15.6359
5	1680.1	2045.99	13.0398	65.1989	651.989			19.8826
5	1644.3	2010.19	12.8116	64.058	640.58			19.5347
6	1252.3	1618.19	10.3133	51.5663	515.663			15.7253
6	1247	1612.89	10.2795	51.3974	513.974			15.6738
	MAP Drug Content calculation
MAP-D6		Calculation from Linearity eqaution
MAP	Area	Conc (ug)	Conc (ug)	Dilution factor (ug)	Dilution factor (ug)	Average (ug/MAP)	Standard Deviation
1	8869.6	9113.55	57.2315	286.158	2861.58	2867.12	379.27
2	8092.3	8336.25	52.3502	261.751	2617.51
3	10121.2	10365.2	65.0914	325.457	3254.57
4	7087.3	7331.25	46.039	230.195	2301.95
5	10265.8	10509.8	65.9994	329.997	3299.97
Ex-Vivo skin Deposition (ug/MAP)
		Calculation from Linearity eqaution							Ex-Vivo skin Deposition (%/MAP)
MAP-D6	Area	Conc (ug)	Conc (ug)	Dilution factor	drug deposited (ug)	Average (ug)	Standard Deviation	%dose delivered per MAP	Average (%)	Standard Deviation
1	624.9	868.85	5.45623	27.2811	272.811	354.822	94.303	9.51524	12.3756	3.55268
2	851.7	1095.65	6.88049	34.4025	344.025			11.999
3	1069.3	1313.25	8.24699	41.2349	412.349			14.3821
4	1349.7	1593.65	10.0078	50.0392	500.392			17.4529
5	514.2	758.15	4.76105	23.8053	238.053			8.30291
6	1192.2	1436.15	9.01878	45.0939	450.939			15.728
7	600.6	844.55	5.30363	26.5181	265.181			9.24912
