# Supplementary material for: A Bilayer Microarray Patch (MAP) for HIV Pre-Exposure Prophylaxis: The Role of MAP Designs and Formulation Composition in Enhancing Long-Acting Drug Delivery
Source: Pharmaceutics. 2024 Jan 20;16(1):142. doi: 10.3390/pharmaceutics16010142 (PMC10819247; doi:10.3390/pharmaceutics16010142)
Supplement: Supplementary file 1 [file pharmaceutics-16-00142-s001.zip › Figure 5 and 6 raw data file.xlsx]

## Sheet: MAP Strength  and Drug Content 
Assessment of CAB Na-MAP mechanical properties																				Determination of CAB Na MAP drug content
MAP prepared from CAB Na loaded hydrogel prepared at various dilutions
For mechanical testing: Compression force of 32 N for 30 seconds at 0.5 mm/sec speed.
D1-F1																				Drug content of various formulautions and MAP designs
MAP1	Highet before	Height after	Height difference	%height reduction								Mechanical strength test										Drug content of original MAP design (ug/MAP)					Original formulation	Formulation F1	MAP-D1-F1	MAP-D4-F1	MAP-D5-F1
side 1	904	867	37	4.09292																	Control						Drug content (ug/MAP)	F1	2895.3	1756.9	3270
	873	863	10	1.14548		%height reduction	Average %height reduction	Standard Deviation		Formulation	D1-F1	D1-F2	D1-F3	D1-F4	D1-F5					Formulation	D1-F1	D1-F2	D1-F3	D1-F4	D1-F5			SD	263	48.2	88.2
	871	845	26	2.98507	D1-F1					Mean	5.03537	5.91369	8.03107	9.45778	10.5224					Mean	2895	872	1085	779	746			Formulartion F3	MAP-D1	MAP-D4	MAP-D5
Side 2	893	757	136	15.2296	MAP1	5.60476	5.03537	1.51134		SD	1.51134	0.294105	1.06555	0.23209	0.995309					SD	263	66	161.54	260	22		Drug content (ug/MAP)	F3	1085.72	725.401	1142.2
	884	779	105	11.8778	MAP2	3.32204																						SD	161.543	145.785	175.927
	849	818	31	3.65135	MAP3	6.1793
side 3	797	773	24	3.01129	D1-F2
	829	777	52	6.27262	MAP1	5.78895	5.91369	0.294105
	781	764	17	2.1767	MAP2	5.70251
Mean	853.444	804.778	48.6667	5.60476	MAP3	6.24961
MAP2	Highet before	Height after	Height difference	%height reduction	D1-F3
side 1	886	875	11	1.24153	MAP1	9.04136	8.03107	1.06555
	881	863	18	2.04313	MAP2	6.91774																						MAP-D1-F3	AUC	Conc (ug/ml)	Dilution factor	ug/ MAP	Average	SD
	878	859	19	2.16401	MAP3	8.13411																						1	4300	25.4007	1270.04	1270.04	1085.72	161.543
	872	854	18	2.06422	D1-F4																							2	2936	17.8565	892.824	892.824
Side 2	865	836	29	3.3526	MAP1	9.71678	9.45778	0.23209																				3	3864	22.9892	1149.46	1149.46
	850	803	47	5.52941	MAP2	9.3879																						4	3434	20.6109	1030.54	1030.54
	845	801	44	5.2071	MAP3	9.26866																						5	1474	9.77019	488.509	488.509
	838	791	47	5.60859	D1-F5
side 3	836	788	48	5.74163	MAP1	11.6689	10.5224	0.995309																				MAP-D4-F3	AUC	Conc (ug/ml)	Dilution factor	ug/ MAP	Average	SD
	823	786	37	4.49575	MAP2	9.87965																						1	2084	13.1441	657.204	657.204	725.401	145.785
	789	783	6	0.760456	MAP3	10.0188																						2	2191	13.7359	686.795	686.795
	785	772	13	1.65605																								3	2337	14.5434	727.171	727.171
Mean	845.667	817.583	28.0833	3.32204																								4	1828	11.7282	586.408	586.408
																												5	3213	19.3886	969.428	969.428
MAP3	Highet before	Height after	Height difference	%height reduction																								MAP-D5-F3	AUC	Conc (ug/ml)	Dilution factor	ug/ MAP	Average	SD
side 1	849	807	42	4.947																								1	2295	14.3111	715.556	715.556	1142.2	175.927
	871	867	4	0.459242																D1-F1								2	4336	25.5998	1279.99	1279.99
	889	867	22	2.47469																MAP-D1-F1	Drug content (ug/MAP)							3	3630	21.695	1084.75	1084.75
	898	871	27	3.00668																	AUC	ug/ml	diluation F	Diluation F	Average	SD		4	4356	25.7105	1285.52	1285.52
Side 2	845	807	38	4.49704																1	8525.4	57.714	288.57	2885.7	2895.32	263.592		5	3029	18.3709	918.543	918.543
	867	805	62	7.1511																2	9687.5	65.181	325.905	3259.05
	889	772	117	13.1609																3	8258.6	55.9997	279.999	2799.99
	893	767	126	14.1097																4	7749.9	52.7311	263.655	2636.55
Side 3	890	803	87	9.77528																MAP-D1-F2
	829	776	53	6.39324																MAP	AUC	Conc (ug/ml)	Dilution factor	ug/ MAP	Average	SD
	805	783	22	2.73292																1	2526	15.5888	779.439	779.439	872.981	66.1155
	845	799	46	5.44379																2	2890	17.602	880.102	880.102
Mean	864.167	810.636	53.8333	6.1793																3	3082	18.664	933.2	933.2
SD	29.5937	39.4925	38.1953	4.25154																4	2959	17.9837	899.184	899.184
D1-F2																				MAP-D1-F3	AUC	Conc (ug/ml)	Dilution factor	ug/ MAP	Average	SD
MAP1																				1	4300	25.4007	1270.04	1270.04	1085.72	161.543
	Highet before	Height after	Height difference	%height reduction																2	2936	17.8565	892.824	892.824
side 1	834	795	39	4.67626																3	3864	22.9892	1149.46	1149.46
	800	780	20	2.5																4	3434	20.6109	1030.54	1030.54
	852	798	54	6.33803																5	1474	9.77019	488.509	488.509
	845	792	53	6.27219
	818	765	53	6.47922																MAP-D1-F4	AUC	Conc (ug/ml)	Dilution factor	ug/ MAP	Average	SD
Side 2	820	780	40	4.87805																1	3965	23.5478	1177.39	1177.39	779.992	260.12
	825	783	42	5.09091																2	2530	15.6109	780.545	780.545
	812	788	24	2.95567																3	1326	8.9516	447.58	447.58
	834	785	49	5.8753																4	2387	14.82	740.998	740.998
	840	765	75	8.92857																5	2432	15.0689	753.443	753.443
	842	761	81	9.61995																MAP-D1-F5	AUC	Conc (ug/ml)	Dilution factor	ug/ MAP	Average	SD
Side 3	821	780	41	4.99391																1	2412	14.9582	747.912	747.912	746.114	22.5603
	831	779	52	6.25752																2	2511	15.5058	775.29	775.29
	820	766	54	6.58537																3	2314	14.4162	720.81	720.81
	823	782	41	4.98177																4	2385	14.8089	740.445	740.445
	840	788	52	6.19048																5	3213	19.3886	969.428	969.428
Mean	828.562	780.438	48.125	5.78895
MAP2
	Highet before	Height after	Height difference	%height reduction
side 1	811	790	21	2.5894
	814	784	30	3.6855
	816	778	38	4.65686
	849	785	64	7.53828
	832	792	40	4.80769
Side 2	846	810	36	4.25532
	847	797	50	5.90319
	854	799	55	6.44028
	834	801	33	3.95683
	847	805	42	4.95868
	849	805	44	5.18257
Side 3	937	805	132	14.0875
	844	798	46	5.45024
	834	791	43	5.15588
	845	788	57	6.74556
	841	792	49	5.8264
Mean	843.75	795	48.75	5.70251
MAP3
	Highet before	Height after	Height difference	%height reduction
side 1	851	792	59	6.93302
	864	798	66	7.63889
	845	804	41	4.85207
	864	805	59	6.8287
	849	792	57	6.71378
Side 2	781	739	42	5.37772
	782	730	52	6.64962
	782	742	40	5.11509
	825	745	80	9.69697
	811	777	34	4.19236
	811	772	39	4.80888
Side 3	824	764	60	7.28155
	783	740	43	5.4917
	797	737	60	7.52823
	787	745	42	5.33672
	775	732	43	5.54839
Mean	814.438	763.375	51.0625	6.24961
D1-F3
MAP1
	Highet before	Height after	Height difference	%height reduction
side 1	830	812	18	2.16867
	822	785	37	4.50122
	835	779	56	6.70659
	816	766	50	6.12745
	836	759	77	9.21053
Side 2	832	743	89	10.6971
	813	771	42	5.16605
	835	743	92	11.018
	815	745	70	8.58896
	812	731	81	9.97537
	835	734	101	12.0958
Side 3	821	721	100	12.1803
	845	734	111	13.1361
	849	728	121	14.2521
	842	735	107	12.7078
	832	781	51	6.12981
Mean	829.375	754.188	75.1875	9.04136
MAP2	Highet before	Height after	Height difference	%height reduction
side 1	868	804	64	7.37327
	861	809	52	6.03949
	852	779	73	8.56808
	840	802	38	4.52381
	850	804	46	5.41176
Side 2	865	783	82	9.47977
	864	783	81	9.375
	851	795	56	6.58049
	847	791	56	6.61157
	829	805	24	2.89505
	835	782	53	6.34731
Side 3	862	805	57	6.61253
	852	767	85	9.97653
	842	779	63	7.48219
	829	777	52	6.27262
	841	781	60	7.13436
Mean	849.25	790.375	58.875	6.91774
MAP3	Highet before	Height after	Height difference	%height reduction
side 1	854	737	117	13.7002
	866	747	119	13.7413
	850	753	97	11.4118
	820	788	32	3.90244
	828	790	38	4.58937
Side 2	840	808	32	3.80952
	830	774	56	6.74699
	843	770	73	8.65955
	838	793	45	5.36993
	846	776	70	8.27423
	825	763	62	7.51515
Side 3	837	758	79	9.43847
	840	779	61	7.2619
	834	741	93	11.1511
	829	759	70	8.44391
	832	781	51	6.12981
Mean	838.25	769.812	68.4375	8.13411
D1-F4
MAP1	Highet before	Height after	Height difference	%height reduction
side 1	825	780	45	5.45455
	830	742	88	10.6024
	859	731	128	14.901
	839	756	83	9.89273
	787	743	44	5.59085
Side 2	829	778	51	6.15199
	821	788	33	4.01949
	838	758	80	9.54654
	823	781	42	5.10328
	805	765	40	4.96894
	835	711	124	14.8503
Side 3	846	718	128	15.13
	846	715	131	15.4846
	849	730	119	14.0165
	804	733	71	8.83085
	833	742	91	10.9244
Mean	829.312	748.188	81.125	9.71678
MAP2	Highet before	Height after	Height difference	%height reduction
side 1	844	736	108	12.7962
	844	718	126	14.9289
	844	717	127	15.0474
	828	726	102	12.3188
	858	721	137	15.9674
Side 2	830	777	53	6.38554
	862	771	91	10.5568
	820	741	79	9.63415
	818	752	66	8.06846
	841	768	73	8.68014
	826	792	34	4.11622
Side 3	811	791	20	2.46609
	851	780	71	8.34313
	839	781	58	6.91299
	841	780	61	7.25327
	832	776	56	6.73077
Mean	836.812	757.938	78.875	9.3879
MAP3	Highet before	Height after	Height difference	%height reduction
side 1	841	782	59	7.01546
	829	788	41	4.94572
	842	768	74	8.7886
	848	761	87	10.2594
	824	770	54	6.5534
Side 2	852	761	91	10.6808
	851	765	86	10.1058
	853	754	99	11.6061
	839	765	74	8.82002
	834	777	57	6.83453
	822	733	89	10.8273
Side 3	836	753	83	9.92823
	861	751	110	12.7758
	844	763	81	9.59716
	843	768	75	8.8968
	844	754	90	10.6635
Mean	841.438	763.312	78.125	9.26866
D1-F5
MAP1	Highet before	Height after	Height difference	%height reduction
side 1	841	721	120	14.2687
	815	714	101	12.3926
	781	696	85	10.8835
	785	709	76	9.68153
	796	698	98	12.3116
Side 2	783	693	90	11.4943
	785	683	102	12.9936
	785	717	68	8.66242
	848	718	130	15.3302
	791	696	95	12.0101
	792	714	78	9.84848
Side 3	811	715	96	11.8372
	818	710	108	13.2029
	816	750	66	8.08824
	813	713	100	12.3001
	816	723	93	11.3971
Mean	804.75	710.625	94.125	11.6689
MAP2	Highet before	Height after	Height difference	%height reduction
side 1	816	727	89	10.9069
	823	719	104	12.6367
	794	743	51	6.42317
	785	718	67	8.53503
	831	777	54	6.49819
Side 2	835	776	59	7.06587
	841	767	74	8.79905
	831	771	60	7.22022
	816	768	48	5.88235
	842	745	97	11.5202
	853	779	74	8.67526
Side 3	837	731	106	12.6643
	847	736	111	13.1051
	852	757	95	11.1502
	835	716	119	14.2515
	832	726	106	12.7404
Mean	829.375	747.25	82.125	9.87965
MAP3	Highet before	Height after	Height difference	%height reduction
side 1	848	812	36	4.24528
	855	785	70	8.18713
	834	779	55	6.59472
	844	766	78	9.24171
	849	759	90	10.6007
Side 2	849	743	106	12.4853
	850	771	79	9.29412
	847	743	104	12.2786
	813	745	68	8.36408
	811	731	80	9.86436
	818	734	84	10.2689
Side 3	806	721	85	10.5459
	839	734	105	12.5149
	821	728	93	11.3276
	842	735	107	12.7078
	832	734	98	11.7788
Mean	834.875	751.25	83.625	10.0188
