# Supplementary material for: A Bilayer Microarray Patch (MAP) for HIV Pre-Exposure Prophylaxis: The Role of MAP Designs and Formulation Composition in Enhancing Long-Acting Drug Delivery
Source: Pharmaceutics. 2024 Jan 20;16(1):142. doi: 10.3390/pharmaceutics16010142 (PMC10819247; doi:10.3390/pharmaceutics16010142)
Supplement: Supplementary file 1 [file pharmaceutics-16-00142-s001.zip › Figure 7 raw data file.xlsx]

## Sheet: F3 CAB depo.ex in-vivo results
Summary of ex-vivo drug deposition for MAP prepared with F3 formulation
		Calculation from Linearity eqaution
MAP-D1-F3	Area	Conc (ug)	Conc (ug)	Conc (ug)	Dilution factor	Drug desposited (ug/MAP)	Average (ug/MAP)	SD	%dose delivered per MAP	Average (	SD
1	434.2	685.82	4.53465	4.53193	22.6596	226.596	299.679	47.3765	20.8652	27.5948	4.77886
2	232.3	483.92	3.19968	3.19776	15.9888	329.9			30.3775
3	893.2	1144.82	7.56956	7.56502	37.8251	378.251			34.8297
4	563.2	814.82	5.3876	5.38436	26.9218	269.218			24.7899
5	626.3	877.92	5.80481	5.80133	29.0067	290.067			26.7096
6	668.6	920.22	6.0845	6.08085	30.4043	304.043			27.9966
		Calculation from Linearity eqaution
MAP-D4-F3	Area	Conc (ug)	Conc (ug)	Conc (ug)	Dilution factor	Drug desposited (ug/MAP)	Average (ug/MAP)	SD	%dose delivered per MAP					Drug deposition (ex vivo)	ug/MAP	MAP-D1	MAP-D4	MAP-D5
1	774.2	1025.82	6.78273	6.77866	33.8933	338.933	273.613	41.4258	46.7494	37.7397	6.38834			Mean	F1	421.019	624.515	590.075
2	543.9	795.52	5.25998	5.25683	26.2841	262.841			36.254					SD		41.6656	46.0164	77.1146
3	420.4	672.02	4.4434	4.44074	22.2037	222.037			30.6258					Mean
4	655.8	907.42	5.99987	5.99627	29.9813	299.813			41.3536					SD	F3	299.7	273.6	352.1
5	488.2	739.82	4.8917	4.88876	24.4438	244.438			33.7156							47.4	41.4	67.9
		Calculation from Linearity eqaution
MAP-D5-F3	Area	Conc (ug)	Conc (ug)	Conc (ug)	Dilution factor	Drug desposited (ug/MAP)	Average (ug/MAP)	SD	%dose delivered per MAP		SD			Drug deposition (ex vivo)	%Dose delivered	MAP-D1	MAP-D4	MAP-D5
1	849.2	1100.82	7.27863	7.27426	36.3713	363.713	297.816	78.7962	31.8488	30.834	6.86937			Mean	F1	14.5	35.5	18.1
2	560	811.62	5.36644	5.36322	26.8161	268.161			23.4817					SD		1	1.5	1.4
3	1122.8	1374.42	9.08768	9.08222	45.4111	454.111			39.7645					Mean	F3	27.5948	37.7	30.8
4	724.5	976.12	6.45411	6.45024	32.2512	322.512			28.241					SD		4.77886	6.4	6.9
Drug deposition in vivo from MAP prepared using F3 formulation
			Calculation from Linearity eqaution			Skin										MAP-D1	MAP-D4	MAP-D5
	MAP-D1-F3	Area	ug/ml	ug/skin	Dilution factor	ug/skin	ug total drug deposited (mg/MAP)= drug deposited in skin +drug in plasma	Average	SD	% Drug dose Deposited	Average	SD		Drug deposition (ex vivo)	ug/MAP	MAP-D1-F1	MAP-D4-F1	MAP-D5-F1
	1	626	5.21765	26.0882	260.882	260.882	333.882	337.289	66.6076	30.7522	31.0659	6.13488		Average	F1	317.5	399.9	513.3
	2	531	4.65882	23.2941	232.941	232.941	305.941			28.1786				SD		60.7	102.8	106.4
	3	1114	8.08824	40.4412	404.412	404.412	477.412			43.9719						MAP-D1-F3	MAP-D4-F3	MAP-D5-F3
	4	619	5.17647	25.8824	258.824	258.824	331.824			30.5625				Average	F3	337.3	308	595
	5	252	3.01765	15.0882	150.882	150.882	223.882			20.6206				SD	SD	66.6	84	172
	6	865	6.62353	33.1176	331.176	331.176	404.176			37.2266				Drug deposition (in vivo)	%Dose delivered	MAP-D1-F1	MAP-D4-F1	MAP-D5-F1
	7	571	4.89412	24.4706	244.706	244.706	317.706			29.2622				Average	F1	11.7	22.7	15.7
	8	696	5.62941	28.1471	281.471	281.471	354.471			32.6484				SD		2.17	5.79	2.82
	9	358	3.64118	18.2059	182.059	182.059	255.059			23.4921						MAP-D1-F3	MAP-D4-F3	MAP-D5-F3
	10	560	4.82941	24.1471	241.471	241.471	314.471			28.9642				Average	F3	31.1	42.5	42.1486
	11	819	6.35294	31.7647	317.647	317.647	390.647			35.9805				SD		6.1	11.9	15.1
	12	640	5.3	26.5	265	265	338			31.1314
	MAP-D4-F3	AUC	ug/ml	ug/skin	Dilution factor	mg/skin	ug total drug deposited (mg/MAP)= drug deposited in skin +drug in plasma	Average	SD	% Drug Deposited	Average	SD
	1	961	7.18824	35.9412	359.412	359.412	403.412	308.338	84.3868	55.6123	42.506	11.9056
	2	890	6.77059	33.8529	338.529	338.529	382.529			52.7336
	3	806	6.27647	31.3824	313.824	313.824	357.824			49.3278
	4	326	3.45294	17.2647	172.647	172.647	216.647			29.8659
	5	854	6.55882	32.7941	327.941	327.941	371.941			51.2739
	6	677	5.51765	27.5882	275.882	275.882	319.882			44.0974
	7	668	5.46471	27.3235	273.235	273.235	317.235			43.7325
	8	619	5.17647	25.8824	258.824	258.824	302.824			41.7457
	9	348	3.58235	17.9118	179.118	179.118	223.118			30.7579
	10	241	2.95294	14.7647	147.647	147.647	191.647			26.4195
	11	1058	7.75882	38.7941	387.941	387.941	431.941			59.5452
	12	205	2.74118	13.7059	137.059	137.059	181.059			24.9599
	MAP-D5-F3	Area	ug/ml	ug/skin	Dilution factor	mg/skin	ug total drug deposited (mg/MAP)= drug deposited in skin +drug in plasma	Average	SD	% Drug Deposited	Average	SD
	1	863	6.61176	33.0588	330.588	330.588	444.588	595.422	171.665	28.9431	42.1486	15.0293
	2	850	6.53529	32.6765	326.765	326.765	440.765			28.6083
	3	1880	12.5941	62.9706	629.706	629.706	743.706			55.1309
	4	1839	12.3529	61.7647	617.647	617.647	731.647			54.0752
	5	1478	10.2294	51.1471	511.471	511.471	625.471			44.7794
	6	1642	11.1941	55.9706	559.706	559.706	673.706			49.0024
	7	2601	16.8353	84.1765	841.765	841.765	955.765			73.6967
	8	1402	9.78235	48.9118	489.118	489.118	603.118			42.8224
	9	651	5.36471	26.8235	268.235	268.235	382.235			23.4841
	10	1615	11.0353	55.1765	551.765	551.765	665.765			48.3071
	11	911	6.89412	34.4706	344.706	344.706	458.706			30.1791
	12	778	6.11176	30.5588	305.588	305.588	419.588			26.7543
