# Supplementary material for: A Bilayer Microarray Patch (MAP) for HIV Pre-Exposure Prophylaxis: The Role of MAP Designs and Formulation Composition in Enhancing Long-Acting Drug Delivery
Source: Pharmaceutics. 2024 Jan 20;16(1):142. doi: 10.3390/pharmaceutics16010142 (PMC10819247; doi:10.3390/pharmaceutics16010142)
Supplement: Supplementary file 1 [file pharmaceutics-16-00142-s001.zip › Figure 8 In vivo single dose raw data file.xlsx]

## Sheet:  In vivo results 
In Vivo single dose study	LCMS results	from plasma		analysis
		Day 0									Day 1								Day 2	Diluted 2 times								Day 3	Diluted 2 time				(ug/ml)				Day 5	Diluted 2 time								Day 7	Diluted 2 time
		Rat No	Time	AUC	ng/ml	ug/ml	Calibration factor	Average (ug/ml)	Standard Deviation		Rat No	AUC	ng/ml	ug/ml	Calibration factor	Average (ug/ml)	Standard Deviation		Rat No	AUC	ng/ml	ug/ml	Calibration factor	Dilution factor	Average (ug/ml)	Standard Deviation		Rat No	AUC	ng/ml	ug/ml	Calibration factor	Dilution factor	Average (ug/ml)	Standard Deviation		Rat No	AUC	ng/ml	ug/ml	Calibration factor	Dilution factor	Average (ug/ml)	Standard Deviation		Rat No	AUC	ng/ml	ug/ml
Cohort 12	MAP-D1-F3	1	4h	4060193	499.933	0.499933	1.99973	2.0931	0.120239	MAP-D1-F3	1	9704046	1183.05	1.18305	4.7322	7.60944	2.20887	MAP-D1-F3	1	22445579	2725.25	2.72525	10.901	21.802	31.4589	5.87862	MAP-D1-F3	1	39414551	4779.14	4.77914	19.1165	38.2331	38.9542	4.22274	MAP-D1-F3	1	38051873	4614.2	4.6142	18.4568	36.9136	36.617	4.19877	MAP-D1-F3	1	27652207	3355.45	3.35545
	MAP-D1-F4	2	4h	4165685	512.701	0.512701	2.05081			MAP-D1-F4	2	13014602	1583.75	1.58375	6.33501			MAP-D1-F4	2	35221657	4271.64	4.27164	17.0866	34.1731			MAP-D1-F4	2	45912983	5565.69	5.56569	22.2628	44.5255			MAP-D1-F4	2	40476540	4907.68	4.90768	19.6307	39.2614			MAP-D1-F4	2	34847730	4226.38	4.22638
	MAP-D1-F5	3	4h	4533280	557.194	0.557194	2.22878			MAP-D1-F5	3	13475657	1639.56	1.63956	6.55823			MAP-D1-F5	3	29011293	3519.95	3.51995	14.0798	28.1596			MAP-D1-F5	3	34294195	4159.38	4.15938	16.6375	33.2751			MAP-D1-F5	3	33585811	4073.64	4.07364	16.2946	32.5891			MAP-D1-F5	3	26061385	3162.9	3.1629
	MAP-D1-F6	4	1h	2028587	254.032	0.254032	1.01613	0.912857	0.215164	MAP-D1-F6	4	18277929	2220.81	2.22081	8.88325			MAP-D1-F6	4	38956567	4723.7	4.7237	18.8948	37.7896			MAP-D1-F6	4	36246311	4395.66	4.39566	17.5826	35.1653			MAP-D1-F6	4	32104829	3894.39	3.89439	15.5775	31.1551			MAP-D1-F6	4	31128639	3776.23	3.77623
	MAP-D1-F7	5	1h	1304424	166.381	0.166381	0.665525			MAP-D1-F7	5	16766566	2037.88	2.03788	8.15152			MAP-D1-F7	5	37126968	4502.25	4.50225	18.009	36.018			MAP-D1-F7	5	42962128	5208.53	5.20853	20.8341	41.6682			MAP-D1-F7	5	43817032	5312	5.312	21.248	42.496			MAP-D1-F7	5	38685855	4690.94	4.69094
	MAP-D1-F8	6	1h	2112833	264.229	0.264229	1.05692			MAP-D1-F8	6	22642582	2749.1	2.7491	10.9964			MAP-D1-F8	6	31749606	3851.39	3.85139	15.4056	30.8111			MAP-D1-F8	6	42125094	5107.21	5.10721	20.4289	40.8577			MAP-D1-F8	6	38437160	4660.84	4.66084	18.6433	37.2867			MAP-D1-F8	6	30993140	3759.83	3.75983
Cohort 13	MAP-D5-F3	7	4h	9924047	1209.68	1.20968	4.83872	4.96695	0.759969	MAP-D5-F3	7	13475657	1639.56	1.63956	6.55823	11.801	3.70829	MAP-D5-F3	7	30302585	3676.25	3.67625	14.705	29.41	33.7278	3.71038	MAP-D5-F3	7	40082432	4859.98	4.85998	19.4399	38.8798	35.6649	5.49924	MAP-D5-F3	7	40822526	4949.55	4.94955	19.7982	39.5964	36.1341	4.8063	MAP-D5-F3	7	34651735	4202.66	4.20266
	MAP-D5-F4	8	4h	11874186	1445.72	1.44572	5.78288			MAP-D5-F4	8	34350045	4166.14	4.16614	16.6646			MAP-D5-F4	8	18798769	2283.85	2.28385	9.13541	34.2578			MAP-D5-F4	8	33497837	4062.99	4.06299	16.252	32.5039			MAP-D5-F4	8	34106935	4136.72	4.13672	16.5469	33.0937			MAP-D5-F4	8	38920354	4719.32	4.71932
	MAP-D5-F5	9	4h	8768492	1069.81	1.06981	4.27925			MAP-D5-F5	9	22156210	2690.23	2.69023	10.7609			MAP-D5-F5	9	33136750	4019.29	4.01929	16.0772	32.1543			MAP-D5-F5	9	31915627	3871.49	3.87149	15.4859	30.9719			MAP-D5-F5	9	40928245	4962.35	4.96235	19.8494	39.6988			MAP-D5-F5	9	39798095	4825.56	4.82556
	MAP-D5-F6	10	1h	2642704	328.363	0.328363	1.31345	1.32258	0.177776	MAP-D5-F6	10	25452554	3089.21	3.08921	12.3568			MAP-D5-F6	10	32162412	3901.36	3.90136	15.6054	31.2108			MAP-D5-F6	10	30306984	3676.78	3.67678	14.7071	29.4142			MAP-D5-F6	10	31396117	3808.61	3.80861	15.2344	30.4688			MAP-D5-F6	10	31004456	3761.2	3.7612
	MAP-D5-F7	11	1h	2304152	287.386	0.287386	1.14954			MAP-D5-F7	11	19381282	2354.36	2.35436	9.41744			MAP-D5-F7	11	36512691	4427.9	4.4279	17.7116	35.4232			MAP-D5-F7	11	40020122	4852.43	4.85243	19.4097	38.8195			MAP-D5-F7	11	33051248	4008.94	4.00894	16.0358	32.0715			MAP-D5-F7	11	26892520	3263.5	3.2635
	MAP-D5-F8	12	1h	3037810	376.186	0.376186	1.50474			MAP-D5-F8	12	31011369	3762.04	3.76204	15.0481			MAP-D5-F8	12	41146789	4988.8	4.9888	19.9552	39.9104			MAP-D5-F8	12	44750784	5425.02	5.42502	21.7001	43.4002			MAP-D5-F8	12	43176235	5234.44	5.23444	20.9378	41.8755			MAP-D5-F8	12	42636985	5169.17	5.16917
Cohort 11	CAB LA IM	19	1h	3950923	486.707	0.486707	1.94683	3.44337	3.26648	CAB LA IM	19	40821443	4949.42	4.94942	19.7977	20.2355	3.56512	CAB LA IM	19	42379470	5138	5.138	20.552	41.104	35.1004	6.15785	CAB LA IM	19	46944302	5690.52	5.69052	22.7621	45.5242	38.4586	6.57934	CAB LA IM	19	43686612	5296.22	5.29622	21.1849	42.3697	38.8027	4.43079	CAB LA IM	19	48175703	5839.57	5.83957
	CAB LA IM	20	1h	14780569	1797.5	1.7975	7.19			CAB LA IM	20	38459113	4663.49	4.66349	18.654			CAB LA IM	20	34584294	4194.49	4.19449	16.778	33.556			CAB LA IM	20	32668663	3962.63	3.96263	15.8505	31.7011			CAB LA IM	20	34303236	4160.48	4.16048	16.6419	33.2838			CAB LA IM	20	34527909	4187.67	4.18767
	CAB LA IM	21	1h	2394514	298.323	0.298323	1.19329			CAB LA IM	21	41871555	5076.53	5.07653	20.3061			CAB LA IM	21	37872051	4592.44	4.59244	18.3697	36.7395			CAB LA IM	21	39394870	4776.75	4.77675	19.107	38.214			CAB LA IM	21	39794137	4825.08	4.82508	19.3003	38.6007			CAB LA IM	21	44295654	5369.93	5.36993
	CAB LA IM	22	4h	5321963	652.654	0.652654	2.61062	6.33483	3.32018	CAB LA IM	22	31675629	3842.44	3.84244	15.3697			CAB LA IM	22	24355073	2956.38	2.95638	11.8255	23.651			CAB LA IM	22	30900684	3748.64	3.74864	14.9946	29.9891			CAB LA IM	22	39446315	4782.98	4.78298	19.1319	38.2639			CAB LA IM	22	46737210	5665.45	5.66545
	CAB LA IM	23	4h	18488396	2246.29	2.24629	8.98515			CAB LA IM	23	54219964	6571.15	6.57115	26.2846			CAB LA IM	23	40222716	4876.96	4.87696	19.5078	39.0156			CAB LA IM	23	46693927	5660.21	5.66021	22.6409	45.2817			CAB LA IM	23	36177267	4387.3	4.3873	17.5492	35.0984			CAB LA IM	23	50332956	6100.67	6.10067
	CAB LA IM	24	4h	15232357	1852.18	1.85218	7.40874			CAB LA IM	24	43306298	5250.18	5.25018	21.0007			CAB LA IM	24	37662363	4567.06	4.56706	18.2682	36.5365			CAB LA IM	24	41282021	5005.17	5.00517	20.0207	40.0414			CAB LA IM	24	46609487	5649.99	5.64999	22.6	45.2			CAB LA IM	24	45517943	5517.88	5.51788
																										Cmax (µg/mL) Calculation											C 28days (µg/mL) calculation
												Concetration(ug/ml)					Standard Deviation Values for gtaph plot										Day 7	Diluted 2 time										Day 28
												MAP-D1-F3	MAP-D1-F5	IM			MAP-D1-F3	MAP-D1-F5	IM								Rat No	AUC	ng/ml	ug/ml	Calibration factor	Dilution factor	Average (ug/ml)	Standard Deviation				Rat No	AUC	ng/ml	ug/ml	Calibration factor	Average (ug/ml)	Standard Deviation
											0	0	0	0		0	0	0	0							CAB LA IM	19	48175703	5839.57	5.83957	23.3583	46.7165	43.5749	5.33786			MAP-D1-F3	1	19140931	868.657	0.868657	3.47463	3.90323	0.806487
											0.041	0.912857	1.32258	3.44337		0.041	0.215164	0.177776	3.26648							CAB LA IM	20	34527909	4187.67	4.18767	16.7507	33.5014					MAP-D1-F4	2	17931607	812.401	0.812401	3.2496
											0.17	2.0931	4.96695	6.33483		0.17	0.120239	0.759969	3.32018							CAB LA IM	21	44295654	5369.93	5.36993	21.4797	42.9595					MAP-D1-F5	3	28945108	1324.73	1.32473	5.29891
											1	7.60944	11.801	20.2355		1	2.20887	3.70829	3.56512							CAB LA IM	22	46737210	5665.45	5.66545	22.6618	45.3236					MAP-D1-F6	4	22860711	1041.69	1.04169	4.16677
											2	31.4589	34.1084	35.1004		2	5.87862	3.88851	6.15785							CAB LA IM	23	50332956	6100.67	6.10067	24.4027	48.8054					MAP-D1-F7	5	22463704	1023.23	1.02323	4.0929
											3	38.9542	35.6649	38.4586		3	4.22274	5.49924	6.57934							CAB LA IM	24	45517943	5517.88	5.51788	22.0715	44.143					MAP-D1-F8	6	17323977	784.135	0.784135	3.13654
											5	36.617	36.1341	38.8027		5	4.19877	4.8063	4.43079																		MAP-D5-F3	7	21033314	956.687	0.956687	3.82675	4.9163	1.2872
											7	30.629	34.5886	43.5749		7	4.49191	5.74474	5.33786								Day 3	Diluted 2 time				(ug/ml)					MAP-D5-F4	8	22873159	1042.27	1.04227	4.16909
											10	19.0322	21.8536	31.3881		10	2.08804	3.67085	2.82292								Rat No	AUC	ng/ml	ug/ml	Calibration factor	Dilution factor	Average (ug/ml)	Standard Deviation			MAP-D5-F5	9	24010077	1095.16	1.09516	4.38064
											14	12.5818	14.2526	23.8836		14	2.42915	2.92752	3.39744							MAP-D1-F3	1	39414551	4779.14	4.77914	19.1165	38.2331	38.9542	4.22274			MAP-D5-F6	10	24935204	1138.2	1.1382	4.55278
											21	4.7355	5.37764	9.07911		21	0.933592	1.12513	1.30573							MAP-D1-F4	2	45912983	5565.69	5.56569	22.2628	44.5255					MAP-D5-F7	11	28381548	1298.51	1.29851	5.19405
											28	3.90323	4.9163	11.1613		28	0.806487	1.2872	3.25593							MAP-D1-F5	3	34294195	4159.38	4.15938	16.6375	33.2751					MAP-D5-F8	12	40099807	1843.62	1.84362	7.3745
																										MAP-D1-F6	4	36246311	4395.66	4.39566	17.5826	35.1653					CAB LA IM	19	60087637	2773.42	2.77342	11.0937	11.1613	3.25593
																										MAP-D1-F7	5	42962128	5208.53	5.20853	20.8341	41.6682					CAB LA IM	20	69225963	3198.52	3.19852	12.7941
																										MAP-D1-F8	6	42125094	5107.21	5.10721	20.4289	40.8577					CAB LA IM	21	90175834	4173.07	4.17307	16.6923
																																					CAB LA IM	22	42261228	1944.17	1.94417	7.77668
																										Day 5	Diluted 2 time										CAB LA IM	23	45981063	2117.21	2.11721	8.46884
																										Rat No	AUC	ng/ml	ug/ml	Calibration factor	Dilution factor	Average (ug/ml)	Standard Deviation				CAB LA IM	24	54974995	2535.59	2.53559	10.1424
																										MAP-D5-F3	7	40822526	4949.55	4.94955	19.7982	39.5964	36.1341	4.8063
																										MAP-D5-F4	8	34106935	4136.72	4.13672	16.5469	33.0937
																										MAP-D5-F5	9	40928245	4962.35	4.96235	19.8494	39.6988
																										MAP-D5-F6	10	31396117	3808.61	3.80861	15.2344	30.4688
																										MAP-D5-F7	11	33051248	4008.94	4.00894	16.0358	32.0715
																										MAP-D5-F8	12	43176235	5234.44	5.23444	20.9378	41.8755
[truncated: 36 more columns]

## Sheet: PK AUC &RF calculation
Pharmacokinetic Calculation
	Rat 1		Dose (mg/kg)	10000						Rat 2		Dose (mg/kg)	10000						Rat 3		Dose (mg/kg)	10000						Rat 4		Dose (mg/kg)	10000						Rat 5		Dose (mg/kg)	10000						Rat 6		Dose (mg/kg)	10000
	Time	Conc.	Log Conc.	(T2-T1)	Avg Cp	AUC	Conc. *Time	AUMC		Time	Conc.	Log Conc.	(T2-T1)	Avg Cp	AUC	Conc. *Time	AUMC		Time	Conc.	Log Conc.	(T2-T1)	Avg Cp	AUC	Conc. *Time	AUMC		Time	Conc.	Log Conc.	(T2-T1)	Avg Cp	AUC	Conc. *Time	AUMC		Time	Conc.	Log Conc.	(T2-T1)	Avg Cp	AUC	Conc. *Time	AUMC		Time	Conc.	Log Conc.	(T2-T1)
CAB-MAP-D1-F3	0.041	1.01613		0.041	0.508064	0.0208306	0.0416613	0.000854056		0.041	0.665525	-0.407179	0.041	0.332763	0.0136433	0.0272865	0.000559374		0.041	1.05692	0.0553559	0.041	0.528458	0.0216668	0.0433336	0.000888338		0.041	1.01613	0.0160003	0.041	0.508064	0.0208306	0.0416613	0.000854056		0.041	0.665525	-0.407179	0.041	0.332763	0.0136433	0.0272865	0.000559374		0.041	1.05692	0.0553559	0.041
	0.17	1.99973	0.693013	0.129	1.50793	0.194523	0.339954	0.0246142		0.17	2.05081	0.718233	0.129	1.35817	0.175203	0.348637	0.0242471		0.17	2.22878	0.801453	0.129	1.64285	0.211927	0.378892	0.0272335		0.17	1.99973	0.693013	0.129	1.50793	0.194523	0.339954	0.0246142		0.17	2.05081	0.718233	0.129	1.35817	0.175203	0.348637	0.0242471		0.17	2.22878	0.801453	0.129
	1	4.7322	1.55439	0.83	3.36597	2.79375	4.7322	2.10495		1	6.33501	1.84609	0.83	4.19291	3.48011	6.33501	2.77371		1	6.55823	1.88072	0.83	4.3935	3.64661	6.55823	2.87891		1	8.88325	2.18417	0.83	5.44149	4.51644	8.88325	3.82763		1	8.15152	2.0982	0.83	5.10116	4.23397	8.15152	3.52757		1	10.9964	2.39757	0.83
	2	21.802	3.082	1	13.2671	13.2671	43.6041	24.1681		2	34.1731	3.53144	1	20.2541	20.2541	68.3462	37.3406		2	28.1596	3.33789	1	17.3589	17.3589	56.3192	31.4387		2	37.7896	3.63203	1	23.3364	23.3364	75.5793	42.2313		2	36.018	3.58402	1	22.0848	22.0848	72.0361	40.0938		2	30.8111	3.42788	1
	3	38.2331	3.6437	1	30.0176	30.0176	114.699	79.1517		3	44.5255	3.79606	1	39.3493	39.3493	133.577	100.961		3	33.2751	3.50481	1	30.7173	30.7173	99.8252	78.0722		3	35.1653	3.56006	1	36.4775	36.4775	105.496	90.5376		3	41.6682	3.72974	1	38.8431	38.8431	125.005	98.5204		3	40.8577	3.7101	1
	5	36.9136	3.60858	2	37.5734	75.1467	184.568	299.267		5	39.2614	3.67024	2	41.8935	83.787	196.307	329.884		5	32.5891	3.48398	2	32.9321	65.8642	162.946	262.771		5	31.1551	3.43898	2	33.1602	66.3204	155.775	261.271		5	42.496	3.74941	2	42.0821	84.1642	212.48	337.485		5	37.2867	3.61864	2
	7	26.8436	3.29003	2	31.8786	63.7572	187.905	372.473		7	33.811	3.52079	2	36.5362	73.0725	236.677	432.984		7	25.3032	3.23093	2	28.9462	57.8923	177.123	340.068		7	30.2098	3.40817	2	30.6825	61.3649	211.469	367.244		7	37.5275	3.62507	2	40.0118	80.0235	262.693	475.173		7	30.0786	3.40382	2
	10	17.7755	2.87782	3	22.3096	66.9287	177.755	548.491		10	19.3736	2.96391	3	26.5923	79.7769	193.736	645.62		10	16.2742	2.78958	3	20.7887	62.3661	162.742	509.796		10	18.7479	2.93108	3	24.4789	73.4367	187.479	598.423		10	22.5251	3.11463	3	30.0263	90.0789	225.251	731.915		10	19.4971	2.97027	3
	14	11.4355	2.43672	4	14.6055	58.422	160.097	675.704		14	12.5391	2.52885	4	15.9564	63.8254	175.548	738.567		14	10.3366	2.33569	4	13.3054	53.2215	144.712	614.908		14	12.6077	2.5343	4	15.6778	62.7112	176.507	727.973		14	17.2303	2.84667	4	19.8777	79.5107	241.224	932.95		14	11.3417	2.42848	4
	21	4.29494	1.45744	7	7.86521	55.0565	90.1937	876.016		21	4.71911	1.55162	7	8.62912	60.4038	99.1012	961.272		21	3.87261	1.35393	7	7.1046	49.7322	81.3247	791.13		21	4.74544	1.55718	7	8.67655	60.7359	99.6543	966.565		21	6.52205	1.87519	7	11.8762	83.1332	136.963	1323.66		21	4.25889	1.44901	7
	28	3.47463	1.24549	7	3.88478	27.1935	97.2895	656.191		28	3.2496	1.17853	7	3.98435	27.8905	90.9889	665.315		28	5.29891	1.6675	7	4.58576	32.1003	148.37	803.93		28	4.16677	1.42714	7	4.45611	31.1928	116.67	757.134		28	4.0929	1.40925	7	5.30748	37.1523	114.601	880.475		28	3.13654	1.14312	7
					AUC (0-t)	392.798								AUC (0-t)	452.028								AUC (0-t)	373.133								AUC (0-t)	420.308								AUC (0-t)	519.414
Pharmacokinetic Calculation
	Rat 1		Dose (mg/kg)	10000						Rat 2		Dose (mg/kg)	10000						Rat 3		Dose (mg/kg)	10000						Rat 4		Dose (mg/kg)	10000						Rat 5		Dose (mg/kg)	10000						Rat 6		Dose (mg/kg)	10000
	Time	Conc.	Log Conc.	(T2-T1)	Avg Cp	AUC	Conc. *Time	AUMC		Time	Conc.	Log Conc.	(T2-T1)	Avg Cp	AUC	Conc. *Time	AUMC		Time	Conc.	Log Conc.	(T2-T1)	Avg Cp	AUC	Conc. *Time	AUMC		Time	Conc.	Log Conc.	(T2-T1)	Avg Cp	AUC	Conc. *Time	AUMC		Time	Conc.	Log Conc.	(T2-T1)	Avg Cp	AUC	Conc. *Time	AUMC		Time	Conc.	Log Conc.	(T2-T1)
CAB MAP-D5-F3	0.041	1.31345		0.041	0.656727	0.0269258	0.0538516	0.00110396		0.041	1.14954	0.139365	0.041	0.574772	0.0235656	0.0471313	0.000966192		0.041	1.50474	0.408623	0.041	0.752372	0.0308473	0.0616945	0.00126474		0.041	1.31345	0.27266	0.041	0.656727	0.0269258	0.0538516	0.00110396		0.041	1.14954	0.139365	0.041	0.574772	0.0235656	0.0471313	0.000966192		0.041	1.50474	0.408623	0.041
	0.17	4.83872	1.57665	0.129	3.07609	0.396815	0.822582	0.05653		0.17	5.78288	1.7549	0.129	3.46621	0.447141	0.983089	0.0664492		0.17	4.27925	1.45378	0.129	2.892	0.373068	0.727473	0.0509013		0.17	4.83872	1.57665	0.129	3.07609	0.396815	0.822582	0.05653		0.17	5.78288	1.7549	0.129	3.46621	0.447141	0.983089	0.0664492		0.17	4.27925	1.45378	0.129
	1	6.55823	1.88072	0.83	5.69847	4.72973	6.55823	3.06304		1	16.6646	2.81328	0.83	11.2237	9.31569	16.6646	7.32378		1	10.7609	2.37592	0.83	7.52009	6.24167	10.7609	4.76768		1	12.3568	2.51421	0.83	8.59778	7.13616	12.3568	5.46946		1	9.41744	2.24256	0.83	7.60016	6.30813	9.41744	4.31622		1	15.0481	2.71125	0.83
	2	29.41	3.38133	1	17.9841	17.9841	58.82	32.6891		2	34.2578	3.53391	1	25.4612	25.4612	68.5156	42.5901		2	32.1543	3.47055	1	21.4576	21.4576	64.3086	37.5348		2	31.2108	3.44077	1	21.7838	21.7838	62.4217	37.3893		2	35.4232	3.56737	1	22.4203	22.4203	70.8465	40.1319		2	39.9104	3.68664	1
	3	38.8798	3.66047	1	34.1449	34.1449	116.639	87.7297		3	32.5039	3.48136	1	33.3809	33.3809	97.5118	83.0137		3	30.9719	3.43308	1	31.5631	31.5631	92.9157	78.6121		3	29.4142	3.38148	1	30.3125	30.3125	88.2427	75.3322		3	38.8195	3.65892	1	37.1213	37.1213	116.458	93.6524		3	43.4002	3.77046	1
	5	39.5964	3.67874	2	39.2381	78.4762	197.982	314.622		5	33.0937	3.49934	2	32.7988	65.5977	165.469	262.98		5	39.6988	3.68132	2	35.3353	70.6707	198.494	291.41		5	30.4688	3.4167	2	29.9415	59.8831	152.344	240.587		5	32.0715	3.46797	2	35.4455	70.891	160.358	276.816		5	41.8755	3.7347	2
	7	33.6213	3.51516	2	36.6089	73.2177	235.349	433.331		7	37.7546	3.63111	2	35.4241	70.8483	264.282	429.751		7	38.6045	3.65337	2	39.1516	78.3033	270.231	468.725		7	30.0896	3.40418	2	30.2792	60.5584	210.627	362.971		7	26.108	3.26224	2	29.0898	58.1795	182.756	343.114		7	41.3534	3.72215	2
	10	19.8616	2.98879	3	26.7414	80.2243	198.616	650.947		10	24.5235	3.19963	3	31.139	93.4171	245.235	764.275		10	21.2993	3.05867	3	29.9519	89.8556	212.993	724.836		10	19.3026	2.96024	3	24.6961	74.0883	193.026	605.48		10	18.2444	2.90386	3	22.1762	66.5287	182.444	547.801		10	27.89	3.32827	3
	14	11.7485	2.46373	4	15.805	63.2202	164.479	726.19		14	14.7529	2.69144	4	19.6382	78.5528	206.541	903.552		14	14.6039	2.68129	4	17.9516	71.8062	204.454	834.893		14	12.555	2.53012	4	15.9288	63.7152	175.77	737.592		14	12.2052	2.50186	4	15.2248	60.8993	170.873	706.635		14	19.6502	2.97809	4
	21	4.41524	1.48506	7	8.08187	56.5731	92.7201	900.197		21	5.56993	1.71738	7	10.1614	71.13	116.969	1132.28		21	5.51264	1.70704	7	10.0583	70.4078	115.765	1120.77		21	4.7252	1.55291	7	8.64009	60.4806	99.2291	962.496		21	4.59077	1.52405	7	8.39799	58.7859	96.4061	935.476		21	7.45208	2.00849	7
	28	3.82675	1.34201	7	4.12099	28.847	107.149	699.542		28	4.16909	1.4277	7	4.86951	34.0866	116.735	817.961		28	4.38064	1.47719	7	4.94664	34.6265	122.658	834.482		28	4.55278	1.51574	7	4.63899	32.4729	127.478	793.474		28	5.19405	1.64751	7	4.89241	34.2469	145.433	846.438		28	7.3745	1.99803	7
					AUC (0-t)	437.841								AUC (0-t)	482.261								AUC (0-t)	475.336								AUC (0-t)	410.855								AUC (0-t)	415.852
	Rat 1		Dose (mg/kg)	10000						Rat 2		Dose (mg/kg)	10000						Rat 3		Dose (mg/kg)	10000						Rat 4		Dose (mg/kg)	10000						Rat 5		Dose (mg/kg)	10000						Rat 6		Dose (mg/kg)	10000
	Time	Conc.	Log Conc.	(T2-T1)	Avg Cp	AUC	Conc. *Time	AUMC		Time	Conc.	Log Conc.	(T2-T1)	Avg Cp	AUC	Conc. *Time	AUMC		Time	Conc.	Log Conc.	(T2-T1)	Avg Cp	AUC	Conc. *Time	AUMC		Time	Conc.	Log Conc.	(T2-T1)	Avg Cp	AUC	Conc. *Time	AUMC		Time	Conc.	Log Conc.	(T2-T1)	Avg Cp	AUC	Conc. *Time	AUMC		Time	Conc.	Log Conc.	(T2-T1)
CAB LA IM	0.041	1.94683		0.041	0.973414	0.03991	0.07982	0.00163631		0.041	7.19	1.97269	0.041	3.595	0.147395	0.29479	0.0060432		0.041	1.19329	0.176716	0.041	0.596646	0.0244625	0.048925	0.00100296		0.041	1.94683	0.666201	0.041	0.973414	0.03991	0.07982	0.00163631		0.041	7.19	1.97269	0.041	3.595	0.147395	0.29479	0.0060432		0.041	1.19329	0.176716	0.041
	0.17	2.61062	0.959587	0.129	2.27872	0.293955	0.443805	0.0337738		0.17	8.98515	2.19557	0.129	8.08758	1.0433	1.52748	0.117536		0.17	7.40874	2.00266	0.129	4.30101	0.554831	1.25949	0.0843925		0.17	2.61062	0.959587	0.129	2.27872	0.293955	0.443805	0.0337738		0.17	8.98515	2.19557	0.129	8.08758	1.0433	1.52748	0.117536		0.17	7.40874	2.00266	0.129
	1	19.7977	2.98557	0.83	11.2042	9.29945	19.7977	8.40022		1	18.654	2.92606	0.83	13.8196	11.4702	18.654	8.3753		1	20.3061	3.01092	0.83	13.8574	11.5017	20.3061	8.94972		1	15.3697	2.7324	0.83	8.99018	7.46185	15.3697	6.56262		1	26.2846	3.26898	0.83	17.6349	14.6369	26.2846	11.542		1	21.0007	3.04456	0.83
	2	41.104	3.71611	1	30.4509	30.4509	82.2081	51.0029		2	33.556	3.51321	1	26.105	26.105	67.1119	42.8829		2	36.7395	3.60385	1	28.5228	28.5228	73.479	46.8925		2	23.651	3.16341	1	19.5104	19.5104	47.302	31.3359		2	39.0156	3.66396	1	32.6501	32.6501	78.0313	52.1579		2	36.5365	3.59831	1
	3	45.5242	3.81824	1	43.3141	43.3141	136.572	109.39		3	31.7011	3.45635	1	32.6285	32.6285	95.1032	81.1075		3	38.214	3.6432	1	37.4768	37.4768	114.642	94.0606		3	29.9891	3.40083	1	26.8201	26.8201	89.9674	68.6347		3	45.2817	3.8129	1	42.1487	42.1487	135.845	106.938		3	40.0414	3.68991	1
	5	42.3697	3.74643	2	43.9469	87.8939	211.849	348.421		5	33.2838	3.50507	2	32.4924	64.9849	166.419	261.522		5	38.6007	3.65327	2	38.4073	76.8147	193.003	307.645		5	38.2639	3.64451	2	34.1265	68.253	191.319	281.287		5	35.0984	3.55816	2	40.1901	80.3802	175.492	311.337		5	45.2	3.8111	2
	7	46.7165	3.8441	2	44.5431	89.0863	327.016	538.864		7	33.5014	3.51159	2	33.3926	66.7852	234.51	400.929		7	42.9595	3.76026	2	40.7801	81.5601	300.716	493.72		7	45.3236	3.81383	2	41.7937	83.5875	317.265	508.585		7	48.8054	3.88784	2	41.9519	83.9038	341.638	517.13		7	44.143	3.78743	2
	10	36.8039	3.6056	3	41.7602	125.281	368.039	1042.58		10	28.6733	3.35597	3	31.0873	93.262	286.733	781.864		10	29.9355	3.39905	3	36.4475	109.342	299.355	900.107		10	30.7195	3.4249	3	38.0215	114.065	307.195	936.69		10	31.5556	3.45175	3	40.1805	120.541	315.556	985.791		10	30.6407	3.42233	3
	14	30.2003	3.40785	4	33.5021	134.008	422.805	1581.69		14	24.3089	3.19084	4	26.4911	105.964	340.324	1254.11		14	23.7783	3.16877	4	26.8569	107.428	332.896	1264.5		14	22.6543	3.12035	4	26.6869	106.747	317.16	1248.71		14	20.317	3.01146	4	25.9363	103.745	284.438	1199.99		14	22.0429	3.09299	4
	21	11.5068	2.44294	7	20.8536	145.975	241.643	2325.57		21	9.24254	2.22382	7	16.7757	117.43	194.093	1870.46		21	9.03862	2.20151	7	16.4084	114.859	189.811	1829.47		21	8.60664	2.15253	7	15.6305	109.413	180.74	1742.65		21	7.70836	2.04231	7	14.0127	98.0888	161.876	1562.1		21	8.37168	2.12485	7
	28	11.0937	2.40638	7	11.3002	79.1017	310.623	1932.93		28	12.7941	2.54898	7	11.0183	77.1281	358.234	1933.15		28	16.6923	2.81495	7	12.8654	90.0581	467.383	2300.18		28	7.77668	2.05113	7	8.19166	57.3416	217.747	1394.7		28	8.46884	2.13639	7	8.0886	56.6202	237.127	1396.51		28	10.1424	2.31672	7
					AUC (0-t)	744.744								AUC (0-t)	596.949								AUC (0-t)	658.143								AUC (0-t)	593.534								AUC (0-t)	633.906
[truncated: 13 more columns]

## Sheet: rat weights and Table3 
																		From excel for Figure 3								From excel for Figure 5
				Route/formulation	Rat No	Rat weight on Day1	Average	mg dose given	Dose (mg/kg)	Average	SD							Drug Content	MAP-D1	MAP-D2	MAP-D3	MAP-D4	MAP-D5	MAP-D6		Original formulation	Formulation F1	MAP-D1-F1	MAP-D4-F1	MAP-D5-F1
				MAP-D1-F3	1	208	211.833	4.34	20.8654									Average (ug)	2714.63	1104.75	1813.79	1756.87	3279.2	2867.12		Drug content (ug/MAP)	F3	1085.72	725.401	1142.2
				MAP-D1-F4	2	226		4.34	19.2035									Standard Deviation	738.785	104.531	151.5	48.1611	88.1	379.3			SD	161.543	145.785	175.927
				MAP-D1-F5	3	206		4.34	21.068
				MAP-D1-F6	4	209		4.34	20.7656
				MAP-D1-F7	5	218		4.34	19.9083									Table 3									MAP dose calculation
				MAP-D1-F8	6	204		4.34	21.2745	20.5142	0.79451							Cohort no.	Administration route/array design/dosing regimen				Rat weight	Number of MAP or injection/rat	Total Dose/rat (mg)	Study period	ug Drug Content per MAP	x4 (4 MAP applied to each rat)	mg total dose applied per rat
				MAP-D5-F3	7	206	199.833	4.6	22.3301																	(days)
				MAP-D5-F4	8	206		4.6	22.3301									1	Intradermally(ID)/Single dose	Drug Deposition			228±8	2x 50 µL	2.6 mg	1
				MAP-D5-F5	9	190		4.6	24.2105									2	MAP-D1-F1/Single dose				236 ±4	4 MAP	10.9mg	1	2714.63	10858.5	10.8585
				MAP-D5-F6	10	199		4.6	23.1156									3	MAP-D2-F1/Single dose				222±4	4 MAP	4.4mg	1	1104.75	4419	4.419
				MAP-D5-F7	11	195		4.6	23.5897									4	MAP-D3-F1/Single dose				224 ±9	4 MAP	7.2mg	1	1813.79	7255.18	7.25518
				MAP-D5-F8	12	203		4.6	22.6601	23.0394	0.752371							5	MAP-D4-F1/Single dose				215±3	4 MAP	7.04mg	1	1756.87	7027.47	7.02747
				CAB LA IM	19	209	218	2.5	11.9617									6	MAP-D5-F1/Single dose				217 ±7	4 MAP	13.1mg	1	3279.2	13116.8	13.1168
				CAB LA IM	20	207		2.5	12.0773									7	MAP-D6-F1/Single dose				215±6	4 MAP	11.5mg	1	2867.12	11468.5	11.4685
				CAB LA IM	21	208		2.5	12.0192									8	MAP-D1-F3/Single dose				207±5	4 MAP	4.3mg	1	1085.72	4342.87	4.34287
				CAB LA IM	22	227		2.5	11.0132									9	MAP-D4-F3/Single dose				209±21	4 MAP	2.9 mg	1	725.401	2901.6	2.9016
				CAB LA IM	23	225		2.5	11.1111									10	MAP-D5- F3/Single dose				210±12	4 MAP	4.6mg	1	1142.2	4568.81	4.56881
				CAB LA IM	24	232		2.5	10.7759	11.4931	0.587935							11	IM/Single dose	Single Dose			218±11	50 µL	2.5 mg	28
																		12	MAP-D1-F3/single dose	PK study			212±8	4 MAP	4.3mg	28	1085.72	4342.87	4.34287
				Cohort no.	Administration route/array design/dosing regimen	Study Objective	Rat weight	Number of MAP or injection/rat	Total Dose/rat (mg)	Study Duration (Days)								13	MAP-D5-F3/single dose				200±6	4 MAP	4.6mg	28	1142.2	4568.81	4.56881
				11	IM/Single dose	Single Dose	218±11	50 µL	2.5 mg	28
				12	MAP-D1-F3/single dose	PK study	212±8	4 MAP	4.3mg	28
				13	MAP-D5-F3/single dose		200±6	4 MAP	4.6mg	28
