# Supplementary material for: A Bilayer Microarray Patch (MAP) for HIV Pre-Exposure Prophylaxis: The Role of MAP Designs and Formulation Composition in Enhancing Long-Acting Drug Delivery
Source: Pharmaceutics. 2024 Jan 20;16(1):142. doi: 10.3390/pharmaceutics16010142 (PMC10819247; doi:10.3390/pharmaceutics16010142)
Supplement: Supplementary file 1 [file pharmaceutics-16-00142-s001.zip › FIgure 9 raw data file.xlsx]

## Sheet: Repeated dose in vivo results
	CAB NA MAP repeated dose in-vivo study samples analysis and graph
Drug Plasma Level														Cohort 14		Cohort 15		Cohort 16
Cohort treatment details	1h (Rat No)	Area	Curve cal 1	Curve cal 1	Curve cal 1	*4 (Calibration factor)	Average(ng/ml)	Standard Deviation						LD: CAB LA(IM)+ MD: CAB LA (IM) (Cohort 1)		LD: CAB LA (IM)+ MD:CAB Na-MAP (Cohort 2)		MD: CAB Na-MAP only (Cohort 3)
LD: CAB LA(IM)+ MD: CAB LA (IM) (Cohort 1)	4	6.03288e+06	5.55257e+06	950.44	949.585	3798.34	3566.16	1322.6					Time (days)	Mean (ng/ml)	Standard Deviation	Mean	Standard Deviation	Mean	Standard Deviation
	5	3.66842e+06	3.1881e+06	545.712	545.22	2180.88						Dose 1	0	0	0	0		0
	6	7.3791e+06	6.89878e+06	1180.87	1179.81	4719.24							0.04	3566.16	1322.6	2878.68	1470.17	481.016	299.711
LD: CAB LA (IM)+ MD:CAB Na-MAP (Cohort 2)	10	2.74242e+06	2.26211e+06	387.208	386.859	1547.44	2878.68	1470.17					0.16	5123.31	2081.91	5375.16	2236.32	1323.83	88.1606
	11	7.68338e+06	7.20307e+06	1232.96	1231.85	4927.4							1	16641	4698.21	17131	5608.35	9611.37	3395.21
	12	3.63963e+06	3.15932e+06	540.785	540.298	2161.19							4	53311.7	7167.13	58439.6	6982.66	49668.6	9652.39
MD: CAB Na-MAP only (Cohort 3)	16	1.79478e+06	1.31446e+06	224.998	224.796	899.182	481.016	299.711				Dose 2	7	67102.2	5496.1	62271.7	12447.7	30003.4	7200.79
	17	965461	485147	83.0432	82.9685	331.874							8	78481	17590.8	59703.3	10370.9	32038.7	4620.58
	18	790211	309897	53.0455	52.9977	211.991						Dose 3	14	60243.5	5995.32	52302.2	7807.09	25719.3	6037.11
													15	60128.2	3444.72	58889.8	17703.9	31856.9	8955.42
												Dose 4	21	73189.3	9370.58	58406	14993.8	40870.4	12387.2
													22	74339.9	8632.64	65667.7	9168.02	61315.2	10664.5
	4h (Rat No)	Area	Curve cal 1	Curve cal 1	Curve cal 1	*4 (Calibration factor)	Average(ng/ml)	Standard Deviation					28	80670.2	2544.35	55101.9	14582.1	44640.2	11181.8
LD: CAB LA(IM)+ MD: CAB LA (IM) (Cohort 1)	1	4.60169e+06	4.12137e+06	705.461	704.826	2819.3	5123.31	2081.91					35	45748.9	3694.22	33070.4	9995.06	20909.5	7751.01
	2	1.14277e+07	1.09474e+07	1873.88	1872.19	7488.77							42	22481.6	2897.35	12644.6	3354.07	10920.8	4648.14
	3	7.87994e+06	7.39962e+06	1266.6	1265.46	5061.85
LD: CAB LA (IM)+ MD:CAB Na-MAP (Cohort 2)	7	5.22967e+06	4.74935e+06	812.953	812.221	3248.88	5375.16	2236.32
	8	6.92813e+06	6.44782e+06	1103.68	1102.69	4410.75								Cohort 14		Cohort 15		Cohort 16
	9	1.2856e+07	1.23757e+07	2118.37	2116.46	8465.84								LD (CAB-LA IM) + once a week MD (CAB-LA IM)		LD (CAB LA IM) + once a week MD (MAP-D1-F3)		LD (MAP-D1-F3) + once a week MD (MAP-D1-F3)
MD: CAB Na-MAP only (Cohort 3)	13	2.46946e+06	1.98915e+06	340.485	340.179	1360.71	1323.83	88.1606					Time (days)	Mean (ug/ml)	Standard Deviation	Mean (ug/ml)	Standard Deviation	Mean (ug/ml)	Standard Deviation
	14	2.23781e+06	1.75749e+06	300.832	300.561	1202.25						Dose 1	0	0	0	0	0	0	0
	15	2.53936e+06	2.05904e+06	352.449	352.132	1408.53							0.04	3.56616	1.3226	2.87868	1.47017	0.481016	0.299711
													0.16	5.12331	2.08191	5.37516	2.23632	1.32383	0.0881606
													1	16.641	4.69821	17.131	5.60835	9.61137	3.39521
													4	53.3117	7.16713	58.4396	6.98266	49.6686	9.65239
	day 1(Rat No)	Area	Curve cal 1	Curve cal 1	Curve cal 1	*4 (Calibration factor)	Average(ng/ml)	Standard Deviation				Dose 2	7	67.1022	5.4961	62.2717	12.4477	30.0034	7.20079
LD: CAB LA(IM)+ MD: CAB LA (IM) (Cohort 1)	1	1.50385e+07	1.45582e+07	2491.95	2489.7	9958.82	16641	4698.21					8	78.481	17.5908	59.7033	10.3709	32.0387	4.62058
	2	2.64688e+07	2.59885e+07	4448.48	4444.48	17777.9						Dose 3	14	60.2435	5.99532	52.3022	7.80709	25.7193	6.03711
	3	2.40276e+07	2.35473e+07	4030.63	4027	16108							15	60.1282	3.44472	58.8898	17.7039	31.8569	8.95542
	4	25958652	25478338	4361.16	4357.24	17428.9						Dose 4	21	73.1893	9.37058	58.406	14.9938	40.8704	12.3872
	5	1.99269e+07	1.94466e+07	3328.7	3325.71	13302.8							22	74.3399	8.63264	65.6677	9.16802	61.3152	10.6645
	6	3.74199e+07	3.69396e+07	6323.01	6317.31	25269.3							28	80.6702	2.54435	55.1019	14.5821	44.6402	11.1818
LD: CAB LA (IM)+ MD:CAB Na-MAP (Cohort 2)	7	2.0117e+07	1.96367e+07	3361.24	3358.21	13432.8	17131	5608.35					35	45.7489	3.69422	33.0704	9.99506	20.9095	7.75101
	8	2.71042e+07	2.66239e+07	4557.25	4553.15	18212.6							42	22.4816	2.89735	12.6446	3.35407	10.9208	4.64814
	9	3.45769e+07	3.40966e+07	5836.36	5831.11	23324.4
	10	1.01749e+07	9.69457e+06	1659.43	1657.94	6631.76
	11	3.17722e+07	3.12919e+07	5356.28	5351.46	21405.8
	12	2.93931e+07	2.89128e+07	4949.04	4944.58	19778.3
MD: CAB Na-MAP only (Cohort 3)	13	1.29595e+07	1.24792e+07	2136.08	2134.15	8536.62	9611.37	3395.21
	14	9.51574e+06	9.03542e+06	1546.61	1545.21	6180.85
	15	2.39477e+07	2.34674e+07	4016.94	4013.32	16053.3
	16	1.7702e+07	1.72217e+07	2947.86	2945.21	11780.8
	17	1.28394e+07	1.23591e+07	2115.52	2113.61	8454.45
	18	1.02193e+07	9.73902e+06	1667.04	1665.54	6662.16
	day 4 (Rat No)	Area	Curve cal 1	Curve cal 1	Curve cal 1	*4 (Calibration factor)	*2 (Dilution Factor)	Average(ng/ml)	Standard Deviation
LD: CAB LA(IM)+ MD: CAB LA (IM) (Cohort 1)	1	3.18079e+07	3.13276e+07	5362.38	5357.55	21430.2	42860.4	53311.7	7167.13
	2	4.68832e+07	4.64029e+07	7942.85	7935.7	31742.8	63485.6
	3	3.75271e+07	3.70468e+07	6341.35	6335.64	25342.6	50685.2
	4	4.08235e+07	4.03432e+07	6905.6	6899.38	27597.5	55195
	5	3.50688e+07	3.45885e+07	5920.56	5915.23	23660.9	47321.8
	6	4.45709e+07	4.40906e+07	7547.05	7540.26	30161	60322.1
LD: CAB LA (IM)+ MD:CAB Na-MAP (Cohort 2)	7	3.49206e+07	3.44403e+07	5895.19	5889.88	23559.5	47119.1	58439.6	6982.66
	8	4.18729e+07	4.13926e+07	7085.23	7078.85	28315.4	56630.8
	9	4.69883e+07	4.6508e+07	7960.84	7953.68	31814.7	63629.4
	10	3.88991e+07	3.84188e+07	6576.19	6570.27	26281.1	52562.2
	11	4.93018e+07	4.88215e+07	8356.84	8349.32	33397.3	66794.6
	12	4.71874e+07	4.67071e+07	7994.92	7987.72	31950.9	63901.8
MD: CAB Na-MAP only (Cohort 3)	13	4.14378e+07	4.09575e+07	7010.75	7004.44	28017.8	56035.6	49668.6	9652.39
	14	2.85948e+07	2.81145e+07	4812.39	4808.06	19232.2	38464.5
	15	2.9503e+07	2.90227e+07	4967.85	4963.37	19853.5	39707
	16	4.71238e+07	4.66435e+07	7984.02	7976.84	31907.4	63814.7
	17	3.72612e+07	3.67809e+07	6295.83	6290.17	25160.7	50321.3
	18	5.20312e+07	5.15509e+07	8824.03	8816.09	35264.4	70528.7
													C42 days (µg/mL) Calculation
													Cmax-1 (µg/mL) & Cmax-2 (µg/mL) Calculation									Cmax-1 (µg/mL)
	day 7 (Rat No)	Area	Curve cal 1	Curve cal 1	Curve cal 1	*4 (Calibration factor)	*2 (Dilution Factor)	Average(ng/ml)	Standard Deviation					day 7 (Rat No)	Area	Curve cal 1	Curve cal 1	Curve cal 1	*4 (Calibration factor)	*2 (Dilution Factor)		Average(ng/ml)	Standard Deviation
LD: CAB LA(IM)+ MD: CAB LA (IM) (Cohort 1)	1	4.16465e+07	4.11662e+07	7046.46	7040.12	28160.5	56321	67102.2	5496.1				LD: CAB LA(IM)+ MD: CAB LA (IM) (Cohort 1)	1	4.16465e+07	4.11662e+07	7046.46	7040.12	28160.5	56321	56.321	67.1022	5.4961
	2	5.43303e+07	5.385e+07	9217.57	9209.28	36837.1	73674.2							2	5.43303e+07	5.385e+07	9217.57	9209.28	36837.1	73674.2	73.6742
	3	4.8516e+07	4.80357e+07	8222.33	8214.93	32859.7	65719.4							3	4.8516e+07	4.80357e+07	8222.33	8214.93	32859.7	65719.4	65.7194
	4	5.01941e+07	4.97138e+07	8509.57	8501.91	34007.6	68015.3							4	5.01941e+07	4.97138e+07	8509.57	8501.91	34007.6	68015.3	68.0153
	5	4.97635e+07	4.92832e+07	8435.88	8428.28	33713.1	67426.3							5	4.97635e+07	4.92832e+07	8435.88	8428.28	33713.1	67426.3	67.4263
	6	5.27098e+07	5.22295e+07	8940.19	8932.15	35728.6	71457.2							6	5.27098e+07	5.22295e+07	8940.19	8932.15	35728.6	71457.2	71.4572
LD: CAB LA (IM)+ MD:CAB Na-MAP (Cohort 2)	7	4.06994e+07	4.02191e+07	6884.35	6878.15	27512.6	55025.2	62271.7	12447.7				LD: CAB LA (IM)+ MD:CAB Na-MAP (Cohort 2)	7	4.06994e+07	4.02191e+07	6884.35	6878.15	27512.6	55025.2	55.0252	62.2717	12.4477
	8	4.71449e+07	4.66646e+07	7987.63	7980.44	31921.8	63843.6							8	4.71449e+07	4.66646e+07	7987.63	7980.44	31921.8	63843.6	63.8436
	9	6.41107e+07	6.36304e+07	10891.7	10881.9	43527.6	87055.2							9	6.41107e+07	6.36304e+07	10891.7	10881.9	43527.6	87055.2	87.0552
	10	3.4767e+07	3.42867e+07	5868.9	5863.62	23454.5	46909							10	3.4767e+07	3.42867e+07	5868.9	5863.62	23454.5	46909	46.909
	11	4.67852e+07	4.63049e+07	7926.07	7918.94	31675.8	63351.5							11	4.67852e+07	4.63049e+07	7926.07	7918.94	31675.8	63351.5	63.3515
	12	4.24687e+07	4.19884e+07	7187.21	7180.74	28723	57445.9							12	4.24687e+07	4.19884e+07	7187.21	7180.74	28723	57445.9	57.4459
MD: CAB Na-MAP only (Cohort 3)	13	2.8067e+07	2.75867e+07	4722.04	4717.79	18871.2	37742.4	30003.4	7200.79													Cmax-1 (µg/mL)
	14	1.5901e+07	1.54207e+07	2639.59	2637.21	10548.8	21097.7							day 4 (Rat No)	Area	Curve cal 1	Curve cal 1	Curve cal 1	*4 (Calibration factor)	*2 (Dilution Factor)		Average(ng/ml)	Standard Deviation
	15	1.63625e+07	1.58822e+07	2718.58	2716.14	10864.5	21729.1						MD: CAB Na-MAP only (Cohort 3)	13	4.14378e+07	4.09575e+07	7010.75	7004.44	28017.8	56035.6	56.0356	49.6686	9.65239
	16	2.98336e+07	2.93533e+07	5024.44	5019.92	20079.7	40159.4							14	2.85948e+07	2.81145e+07	4812.39	4808.06	19232.2	38464.5	38.4645
	17	2.20435e+07	2.15632e+07	3691	3687.68	14750.7	29501.4							15	2.9503e+07	2.90227e+07	4967.85	4963.37	19853.5	39707	39.707
	18	2.22546e+07	2.17743e+07	3727.14	3723.78	14895.1	29790.3							16	4.71238e+07	4.66435e+07	7984.02	7976.84	31907.4	63814.7	63.8147
														17	3.72612e+07	3.67809e+07	6295.83	6290.17	25160.7	50321.3	50.3213
														18	5.20312e+07	5.15509e+07	8824.03	8816.09	35264.4	70528.7	70.5287
	day 8 (Rat No)	Area	Curve cal 1	Curve cal 1	Curve cal 1	*4 (Calibration factor)	*3 (Dilution Factor)	Average(ng/ml)	Standard Deviation													Cmax-2 (µg/mL)
LD: CAB LA(IM)+ MD: CAB LA (IM) (Cohort 1)	1	6.86529e+07	6.86131e+07	8153.86	8153.05	32612.2	97836.6	78481	17590.8					day 8 (Rat No)	Area	Curve cal 1	Curve cal 1	Curve cal 1	*4 (Calibration factor)	*3 (Dilution Factor)		Average(ng/ml)	Standard Deviation
	2	6.97924e+07	6.97526e+07	8289.28	8288.45	33153.8	99461.4						LD: CAB LA(IM)+ MD: CAB LA (IM) (Cohort 1)	1	6.86529e+07	6.86131e+07	8153.86	8153.05	32612.2	97836.6	97.8366	78.481	17.5908
	3	6.20982e+07	6.20584e+07	7374.91	7374.17	29496.7	88490.1							2	6.97924e+07	6.97526e+07	8289.28	8288.45	33153.8	99461.4	99.4614
	4	4.72494e+07	4.72096e+07	5610.3	5609.74	22439	67316.9							3	6.20982e+07	6.20584e+07	7374.91	7374.17	29496.7	88490.1	88.4901
	5	3.78545e+07	3.78146e+07	4493.83	4493.38	17973.5	53920.5							4	4.72494e+07	4.72096e+07	5610.3	5609.74	22439	67316.9	67.3169
	6	4.48252e+07	4.47854e+07	5322.22	5321.69	21286.7	63860.2							5	3.78545e+07	3.78146e+07	4493.83	4493.38	17973.5	53920.5	53.9205
LD: CAB LA (IM)+ MD:CAB Na-MAP (Cohort 2)	7	3.37429e+07	3.37031e+07	4005.22	4004.82	16019.3	48057.8	59703.3	10370.9					6	4.48252e+07	4.47854e+07	5322.22	5321.69	21286.7	63860.2	63.8602
	8	3.98559e+07	3.98161e+07	4731.68	4731.21	18924.8	56774.5						LD: CAB LA (IM)+ MD:CAB Na-MAP (Cohort 2)	7	3.37429e+07	3.37031e+07	4005.22	4004.82	16019.3	48057.8	48.0578	59.7033	10.3709
	9	5.67675e+07	5.67277e+07	6741.42	6740.74	26963	80888.9							8	3.98559e+07	3.98161e+07	4731.68	4731.21	18924.8	56774.5	56.7745
	10	3.80265e+07	3.79867e+07	4514.27	4513.82	18055.3	54165.8							9	5.67675e+07	5.67277e+07	6741.42	6740.74	26963	80888.9	80.8889
	11	3.92572e+07	3.92174e+07	4660.53	4660.06	18640.2	55920.7							10	3.80265e+07	3.79867e+07	4514.27	4513.82	18055.3	54165.8	54.1658
	12	4.38095e+07	4.37697e+07	5201.51	5200.99	20804	62411.9							11	3.92572e+07	3.92174e+07	4660.53	4660.06	18640.2	55920.7	55.9207
MD: CAB Na-MAP only (Cohort 3)	13	2.50231e+07	2.49833e+07	2968.97	2968.67	11874.7	35624.1	32038.7	4620.58					12	4.38095e+07	4.37697e+07	5201.51	5200.99	20804	62411.9	62.4119
	14	1.71431e+07	1.71033e+07	2032.52	2032.32	8129.28	24387.8						MD: CAB Na-MAP only (Cohort 3)	13	2.50231e+07	2.49833e+07	2968.97	2968.67	11874.7	35624.1	35.6241	32.0387	4.62058
	15	1.89254e+07	1.88856e+07	2244.33	2244.11	8976.44	26929.3							14	1.71431e+07	1.71033e+07	2032.52	2032.32	8129.28	24387.8	24.3878
	16	2.39266e+07	2.38868e+07	2838.66	2838.38	11353.5	34060.6							15	1.89254e+07	1.88856e+07	2244.33	2244.11	8976.44	26929.3	26.9293
	17	2.45389e+07	2.44991e+07	2911.43	2911.14	11644.6	34933.7							16	2.39266e+07	2.38868e+07	2838.66	2838.38	11353.5	34060.6	34.0606
	18	2.5495e+07	2.54552e+07	3025.05	3024.75	12099	36297							17	2.45389e+07	2.44991e+07	2911.43	2911.14	11644.6	34933.7	34.9337
														18	2.5495e+07	2.54552e+07	3025.05	3024.75	12099	36297	36.297
														Results	*no add dilution						C42 days (µg/mL)
	Rat No (day 14 )	Area	Curve cal 1	Curve cal 1	Curve cal 1	*4 (Calibration factor)	*3 (Dilution Factor)	Average(ng/ml)	Standard Deviation					42 days (Rat No)	Area	Curve cal 1	Curve cal 1	Curve cal 1	*4 (Calibration factor)	Average(ng/ml)	Standard Deviation
LD: CAB LA(IM)+ MD: CAB LA (IM) (Cohort 1)	1	4.25669e+07	4.25271e+07	5053.85	5053.34	20213.4	60640.1	60243.5	5995.32				LD: CAB LA(IM)+ MD: CAB LA (IM) (Cohort 1)	1	1.57848e+07	1.54471e+07	6073.89	6069.64	24278.5	24.2785	22.4816	2.89735
	2	4.72101e+07	4.71703e+07	5605.63	5605.07	22420.3	67260.9							2	1.59076e+07	1.55699e+07	6122.16	6117.88	24471.5	24.4715
	3	4.27426e+07	4.27028e+07	5074.73	5074.22	20296.9	60890.7							3	1.34106e+07	1.30729e+07	5140.35	5136.75	20547	20.547
	4	3.41062e+07	3.40664e+07	4048.39	4047.99	16192	48575.9							4	1.11029e+07	1.07653e+07	4232.96	4229.99	16920	16.92
	5	4.59423e+07	4.59024e+07	5454.97	5454.42	21817.7	65453							5	1.63949e+07	1.60572e+07	6313.79	6309.37	25237.5	25.2375
	6	4.11644e+07	4.11246e+07	4887.18	4886.69	19546.8	58640.3							6	1.52483e+07	1.49107e+07	5862.95	5858.84	23435.4	23.4354
LD: CAB LA (IM)+ MD:CAB Na-MAP (Cohort 2)	7	3.45557e+07	3.45159e+07	4101.81	4101.4	16405.6	49216.8	52302.2	7807.09				LD: CAB LA (IM)+ MD:CAB Na-MAP (Cohort 2)	7	7.11577e+06	6.77808e+06	2665.18	2663.31	10653.2	10.6532	12.6446	3.35407
	8	4.31493e+07	4.31095e+07	5123.05	5122.54	20490.2	61470.5							8	7.05202e+06	6.71433e+06	2640.11	2638.26	10553	10.553
	9	4.15268e+07	4.1487e+07	4930.24	4929.75	19719	59156.9							9	1.19375e+07	1.15998e+07	4561.11	4557.91	18231.7	18.2317
	10	4.11375e+07	4.10977e+07	4883.98	4883.49	19533.9	58601.8							10	1.06861e+07	1.03484e+07	4069.06	4066.21	16264.9	16.2649
	11	3.02942e+07	3.02544e+07	3595.38	3595.02	14380.1	43140.3							11	7.34043e+06	7.00274e+06	2753.51	2751.59	11006.3	11.0063
	12	2.96537e+07	2.96139e+07	3519.26	3518.91	14075.6	42226.9							12	6.16471e+06	5.82702e+06	2291.21	2289.61	9158.44	9.15844
MD: CAB Na-MAP only (Cohort 3)	13	2.15451e+07	2.15052e+07	2555.65	2555.39	10221.6	30664.7	25719.3	6037.11					13	8.2533e+06	7.91561e+06	3112.46	3110.28	12441.1	12.4411	10.9208	4.64814
	14	1.80687e+07	1.80289e+07	2142.52	2142.31	8569.23	25707.7							14	8.84301e+06	8.50532e+06	3344.34	3342	13368	13.368
	15	2.39055e+07	2.38656e+07	2836.15	2835.87	11343.5	34030.4							15	1.23473e+07	1.20096e+07	4722.23	4718.93	18875.7	18.8757
	16	1.45661e+07	1.45263e+07	1726.28	1726.11	6904.44	20713.3							16	6.43843e+06	6.10074e+06	2398.84	2397.17	9588.66	9.58866
	17	1.11546e+07	1.11148e+07	1320.87	1320.73	5282.93	15848.8							17	3.71607e+06	3.37838e+06	1328.4	1327.47	5309.86	5.30986
	18	1.9221e+07	1.91812e+07	2279.46	2279.24	9116.95	27350.8							18	4.11795e+06	3.78026e+06	1486.42	1485.38	5941.51	5.94151
	day 15 (Rat No)	Area	Curve cal 1	Curve cal 1	Curve cal 1	*4 (Calibration factor)	*3 (Dilution Factor)	Average(ng/ml)	Standard Deviation
LD: CAB LA(IM)+ MD: CAB LA (IM) (Cohort 1)	1	4.2177e+07	4.21372e+07	5007.5	5007	20028	60084	60128.2	3444.72
	2	4.34693e+07	4.34295e+07	5161.08	5160.57	20642.3	61926.8
	3	4.07892e+07	4.07494e+07	4842.59	4842.11	19368.4	58105.3
	4	3.95104e+07	3.94706e+07	4690.62	4690.15	18760.6	56281.8
	5	4.68108e+07	4.6771e+07	5558.18	5557.63	22230.5	66691.5
	6	4.04908e+07	4.0451e+07	4807.13	4806.64	19226.6	57679.7
LD: CAB LA (IM)+ MD:CAB Na-MAP (Cohort 2)	7	3.42291e+07	3.41893e+07	4063	4062.59	16250.4	48751.1	58889.8	17703.9
	8	6.46308e+07	6.4591e+07	7675.88	7675.11	30700.4	92101.3
	9	4.83234e+07	4.82836e+07	5737.93	5737.36	22949.4	68848.3
	10	4.19529e+07	4.19131e+07	4980.88	4980.38	19921.5	59764.5
	11	2.93595e+07	2.93197e+07	3484.3	3483.95	13935.8	41807.4
	12	2.9541e+07	2.95012e+07	3505.87	3505.52	14022.1	42066.2
MD: CAB Na-MAP only (Cohort 3)	13	3.37184e+07	3.36786e+07	4002.31	4001.91	16007.6	48022.9	31856.9	8955.42
	14	1.9429e+07	1.93892e+07	2304.18	2303.95	9215.78	27647.4
	15	2.69098e+07	2.687e+07	3193.18	3192.86	12771.4	38314.3
	16	1.82953e+07	1.82555e+07	2169.45	2169.24	8676.95	26030.9
	17	1.45578e+07	1.4518e+07	1725.29	1725.12	6900.46	20701.4
	18	2.13766e+07	2.13368e+07	2535.62	2535.37	10141.5	30424.4
	21 days (Rat No)	Area	Curve cal 1	Curve cal 1	Curve cal 1	*4 (Calibration factor)	*4 (Dilution Factor)	Average(ng/ml)	Standard Deviation
LD: CAB LA(IM)+ MD: CAB LA (IM) (Cohort 1)	1	1.47385e+07	1.44008e+07	5662.48	5658.52	22634.1	90536.3	73189.3	9370.58
	2	2.01452e+07	1.98075e+07	7788.41	7782.96	31131.8	outliner
	3	1.10257e+07	1.0688e+07	4202.57	4199.63	16798.5	67194
	4	1.03807e+07	1.0043e+07	3948.98	3946.21	15784.8	63139.4
	5	1.19403e+07	1.16026e+07	4562.21	4559.02	18236.1	72944.2
	6	1.18112e+07	1.14735e+07	4511.45	4508.3	18033.2	72132.7
LD: CAB LA (IM)+ MD:CAB Na-MAP (Cohort 2)	7	9.30621e+06	8.96852e+06	3526.47	3524	14096	56384	58406	14993.8
	8	1.29096e+07	1.25719e+07	4943.33	4939.87	19759.5	79037.9
	9	1.15515e+07	1.12138e+07	4409.31	4406.23	17624.9	70499.6
	10	1.06746e+07	1.03369e+07	4064.52	4061.68	16246.7	64986.8
	11	7.32306e+06	6.98537e+06	2746.69	2744.76	10979.1	43916.2
	12	6.00208e+06	5.66439e+06	2227.27	2225.71	8902.85	35611.4
MD: CAB Na-MAP only (Cohort 3)	13	8.15906e+06	7.82137e+06	3075.4	3073.25	12293	49172	40870.4	12387.2
	14	6.43828e+06	6.10059e+06	2398.79	2397.11	9588.42	38353.7
	15	1.00915e+07	9.75381e+06	3835.25	3832.57	15330.3	61321
	16	7.12653e+06	6.78884e+06	2669.41	2667.54	10670.2	42680.7
	17	3.98578e+06	3.64809e+06	1434.45	1433.44	5733.78	22935.1
	18	5.23039e+06	4.8927e+06	1923.84	1922.49	7689.97	30759.9
	Results
	22 days	Area	Curve cal 1	Curve cal 1	Curve cal 1	*4 (Calibration factor)	*4 (Dilution Factor)	Average(ng/ml)	Standard Deviation
LD: CAB LA(IM)+ MD: CAB LA (IM) (Cohort 1)	1	1.29116e+07	1.25739e+07	4944.13	4940.67	19762.7	79050.7	74339.9	8632.64
	2	1.01316e+07	9.79388e+06	3851.01	3848.31	15393.2	61573
	3	1.06829e+07	1.03452e+07	4067.79	4064.95	16259.8	65039.1
	4	1.24572e+07	1.21195e+07	4765.46	4762.12	19048.5	76193.9
	5	1.4205e+07	1.38673e+07	5452.72	5448.9	21795.6	87182.4
	6	1.25855e+07	1.22478e+07	4815.89	4812.52	19250.1	77000.4
LD: CAB LA (IM)+ MD:CAB Na-MAP (Cohort 2)	7	9.08913e+06	8.75144e+06	3441.11	3438.7	13754.8	55019.2	65667.7	9168.02
	8	1.25648e+07	1.22271e+07	4807.76	4804.39	19217.6	76870.3
	9	1.13523e+07	1.10146e+07	4330.98	4327.95	17311.8	69247.2
	10	1.15055e+07	1.11678e+07	4391.23	4388.16	17552.6	70210.6
	11	1.16608e+07	1.13231e+07	4452.29	4449.18	17796.7	71186.9
	12	8.5249e+06	8.18721e+06	3219.26	3217	12868	51472
MD: CAB Na-MAP only (Cohort 3)	13	1.06876e+07	1.03499e+07	4069.63	4066.78	16267.1	65068.4	61315.2	10664.5
	14	9.28468e+06	8.94699e+06	3518.01	3515.54	14062.2	56248.7
	15	1.08922e+07	1.05545e+07	4150.08	4147.17	16588.7	66354.8
	16	1.23005e+07	1.19628e+07	4703.84	4700.55	18802.2	75208.8
	17	7.28789e+06	6.9502e+06	2732.86	2730.94	10923.8	43695.1
	18	outliner
	Results
	28 days (Rat No)	Area	Curve cal 1	Curve cal 1	Curve cal 1	*4 (Calibration factor)	*4 (Dilution Factor)	Average(ng/ml)	Standard Deviation
LD: CAB LA(IM)+ MD: CAB LA (IM) (Cohort 1)	1	1.32948e+07	1.29571e+07	5094.8	5091.24	20364.9	81459.8	80670.2	2544.35
	2	1.27481e+07	1.24104e+07	4879.83	4876.42	19505.7	78022.7
	3	1.3558e+07	1.32204e+07	5198.32	5194.68	20778.7	83114.8
	4	1.25172e+07	1.21795e+07	4789.06	4785.71	19142.8	76571.3
	5	1.32793e+07	1.29416e+07	5088.71	5085.15	20340.6	81362.4
	6	1.36178e+07	1.32801e+07	5221.8	5218.14	20872.6	83490.3
LD: CAB LA (IM)+ MD:CAB Na-MAP (Cohort 2)	7	8.61258e+06	8.27489e+06	3253.73	3251.45	13005.8	52023.3	55101.9	14582.1
	8	1.27386e+07	1.24009e+07	4876.09	4872.68	19490.7	77962.8
	9	1.17516e+07	1.14139e+07	4488.01	4484.87	17939.5	71758
	10	6.54769e+06	6.21e+06	2441.81	2440.1	9760.39	39041.6
	11	7.38489e+06	7.0472e+06	2771	2769.06	11076.2	44304.9
	12	7.5783e+06	7.24061e+06	2847.05	2845.05	11380.2	45520.8
	13	8.10598e+06	7.76829e+06	3054.53	3052.39	12209.6	48838.3	44640.2	11181.8
	14	9.53995e+06	9.20226e+06	3618.38	3615.84	14463.4	57853.5
	15	9.74039e+06	9.4027e+06	3697.19	3694.6	14778.4	59113.7
	16	6.12945e+06	5.79176e+06	2277.35	2275.76	9103.03	36412.1
	17	5.44524e+06	5.10755e+06	2008.32	2006.91	8027.65	32110.6
	18	5.66832e+06	5.33063e+06	2096.03	2094.57	8378.27	33513.1
	Results
	35 days	Area	Curve cal 1	Curve cal 1	Curve cal 1	*4 (Calibration factor)	*4 (Dilution Factor)	Average(ng/ml)	Standard Deviation
LD: CAB LA(IM)+ MD: CAB LA (IM) (Cohort 1)	1	7.90461e+06	7.56692e+06	2975.36	2973.27	11893.1	47572.4	45748.9	3694.22
	2	7.12917e+06	6.79148e+06	2670.45	2668.58	10674.3	42697.2
	3	8.17325e+06	7.83556e+06	3080.98	3078.83	12315.3	49261.2
	4	6.53736e+06	6.19967e+06	2437.74	2436.04	9744.14	38976.6
	5	8.08249e+06	7.7448e+06	3045.3	3043.17	12172.7	48690.7
	6	7.86052e+06	7.52283e+06	2958.02	2955.95	11823.8	47295.1
LD: CAB LA (IM)+ MD:CAB Na-MAP (Cohort 2)	7	6.51721e+06	6.17952e+06	2429.82	2428.12	9712.48	38849.9	33070.4	9995.06
	8	7.76459e+06	7.4269e+06	2920.3	2918.25	11673	46692.1
	9	6.69256e+06	6.35487e+06	2498.77	2497.02	9988.08	39952.3
	10	5.43028e+06	5.09259e+06	2002.43	2001.03	8004.13	32016.5
	11	4.00815e+06	3.67046e+06	1443.24	1442.23	5768.94	23075.7
	12	3.1747e+06	2.83701e+06	1115.53	1114.75	4458.98	17835.9
	13	4.21648e+06	3.87879e+06	1525.16	1524.09	6096.38	24385.5	20909.5	7751.01
	14	4.83101e+06	4.49332e+06	1766.8	1765.56	7062.24	28249
	15	5.33114e+06	4.99345e+06	1963.45	1962.08	7848.31	31393.2
	16	3.22482e+06	2.88713e+06	1135.23	1134.44	4537.76	18151
	17	1.93455e+06	1.59686e+06	627.893	627.453	2509.81	10039.3
	18	2.44348e+06	2.10579e+06	828.008	827.428	3309.71	13238.8
	Results	*no add dilution
	42 days (Rat No)	Area	Curve cal 1	Curve cal 1	Curve cal 1	*4 (Calibration factor)	Average(ng/ml)	Standard Deviation
LD: CAB LA(IM)+ MD: CAB LA (IM) (Cohort 1)	1	1.57848e+07	1.54471e+07	6073.89	6069.64	24278.5	22481.6	2897.35
	2	1.59076e+07	1.55699e+07	6122.16	6117.88	24471.5
	3	1.34106e+07	1.30729e+07	5140.35	5136.75	20547
	4	1.11029e+07	1.07653e+07	4232.96	4229.99	16920
	5	1.63949e+07	1.60572e+07	6313.79	6309.37	25237.5
	6	1.52483e+07	1.49107e+07	5862.95	5858.84	23435.4
LD: CAB LA (IM)+ MD:CAB Na-MAP (Cohort 2)	7	7.11577e+06	6.77808e+06	2665.18	2663.31	10653.2	12644.6	3354.07
	8	7.05202e+06	6.71433e+06	2640.11	2638.26	10553
	9	1.19375e+07	1.15998e+07	4561.11	4557.91	18231.7
	10	1.06861e+07	1.03484e+07	4069.06	4066.21	16264.9
	11	7.34043e+06	7.00274e+06	2753.51	2751.59	11006.3
	12	6.16471e+06	5.82702e+06	2291.21	2289.61	9158.44
	13	8.2533e+06	7.91561e+06	3112.46	3110.28	12441.1	10920.8	4648.14
	14	8.84301e+06	8.50532e+06	3344.34	3342	13368
	15	1.23473e+07	1.20096e+07	4722.23	4718.93	18875.7
	16	6.43843e+06	6.10074e+06	2398.84	2397.17	9588.66
	17	3.71607e+06	3.37838e+06	1328.4	1327.47	5309.86
	18	4.11795e+06	3.78026e+06	1486.42	1485.38	5941.51
